# Supplementary material for: A Comparative Study of Large Language Models in Explaining Intrinsically Disordered Proteins
Source: Preprints.org preprint supplement (doi:10.20944/preprints202308.1014.v1), 2023-08-14
Supplement: Supplementary file 1 [file supplementary]

**Prompt:**

"QUESTION HERE"

*Please assume the role of an expert and answer this question to the best of your ability. The reader should not be able to know how the answer was generated. Do not mention any limitations on your ability to access data.*

## **1. How has the traditional "one structure, one function" paradigm limited our understanding of protein functionality and roles of proteins in biological systems?**

The traditional "one structure, one function" paradigm has been a cornerstone in the field of molecular biology and protein science. This framework refers to the idea that the three-dimensional structure of a protein determines its specific function. It has allowed us to develop invaluable insights into protein functions and their roles in biological systems.

However, with the advent of more advanced techniques, our understanding of protein science has significantly expanded, revealing limitations in the "one structure, one function" paradigm. Here are a few key ways this concept has limited our understanding of protein functionality and their roles in biological systems:

- 1. Protein Dynamics:** This paradigm underestimates the importance of protein dynamics. Proteins are not static entities; they undergo significant conformational changes. The idea of one structure being responsible for one function does not account for the range of functions that can be achieved through these dynamic structural alterations.
- 2. Intrinsically Disordered Proteins (IDPs):** It's been found that a significant portion of proteins or protein regions are intrinsically disordered, meaning they lack a fixed or stable structure. These proteins can perform various functions depending on their interaction partners, challenging the "one structure, one function" paradigm.
- 3. Multifunctional Proteins:** There are proteins known to perform more than one function, also known as moonlighting proteins. These proteins can exhibit different functionalities depending on their localization, modifications, or interacting partners.
- 4. Allostery:** Allosteric regulation, where a protein's function is controlled by a conformational change induced by the binding of a molecule at a site other than the protein's active site, also challenges this paradigm. The same protein structure can have different functions depending on the presence or absence of allosteric modulators.
- 5. Post-Translational Modifications:** Proteins can be modified after their initial synthesis through processes such as phosphorylation, acetylation, or glycosylation. These modifications can drastically change a protein's function without changing its overall structure.
- 6. Protein-Protein Interactions:** This paradigm doesn't fully consider the importance of protein-protein interactions. Many proteins work in complex networks where their function is dependent on their interaction with other proteins, not just their own structure.

Overall, while the "one structure, one function" paradigm has been immensely useful in understanding protein functionality, the reality is more complex. Recognizing these limitations can pave the way for a more comprehensive understanding of proteins, their functionality, and their roles in complex biological systems.

## **2. How do intrinsically disordered proteins challenge the structure-function paradigm, and what evidence supports their importance in cellular processes?**

Intrinsically disordered proteins (IDPs) or intrinsically disordered regions (IDRs) in proteins pose a significant challenge to the traditional structure-function paradigm in molecular biology, which posits that a protein's function is directly related to its three-dimensional structure.

The classical structure-function paradigm relies on the Anfinsen's dogma, which states that the information required for a protein to adopt its native structure resides in its amino acid sequence. This results in a unique and stable structure critical for function. In contrast, IDPs/IDRs do not adopt a single, fixed three-dimensional structure under physiological conditions; instead, they exist in a dynamic ensemble of conformations that interchange rapidly.

The discovery of IDPs/IDRs has fundamentally changed our understanding of protein science in several ways:

**1. Alternative Function Mechanisms:** IDPs/IDRs can interact with multiple partners and participate in numerous cellular functions, challenging the "one structure, one function" concept. Their flexible nature allows for unique ways of protein-protein interaction, such as via "fuzzy" complexes, where both binding partners remain flexible.

**2. Regulation and Signaling:** Many IDPs/IDRs are involved in regulation, signaling pathways, and hub proteins in protein-protein interaction networks, often acting as integrators of multiple signals. Their disorder and flexibility allow for a high degree of plasticity and adaptability.

**3. Post-Translational Modifications:** IDPs/IDRs are often the site of post-translational modifications, which can influence their structure and function. This further supports the role of disorder in regulation and signaling.

There is abundant evidence for the importance of IDPs/IDRs in cellular processes:

**1. Prevalence:** Genome-wide studies have shown that IDRs are abundant in eukaryotic proteins. A large portion of the human proteome is predicted to contain long IDRs.

**2. Disease Association:** A large number of diseases, including neurodegenerative diseases (such as Alzheimer's and Parkinson's) and cancer, are associated with IDPs. In these conditions, misregulation or aggregation of these proteins often plays a significant role.

**3. Experimental Evidence:** Direct experimental evidence includes the identification of IDPs/IDRs using techniques such as nuclear magnetic resonance (NMR), small-angle X-ray scattering (SAXS), and cryo-electron microscopy. For example, the tumor suppressor protein p53, which is known to play a critical role in preventing cancer, contains disordered regions that are crucial for its function.

Thus, IDPs/IDRs challenge the classical structure-function paradigm by demonstrating that protein function can also arise from a lack of fixed structure and that this disorder can be crucial for biological activity. Their prevalence and involvement in key cellular processes underscore their biological importance and the necessity of including protein disorder in our understanding of protein function.

### 3. What are some misconceptions about intrinsically disordered proteins that persist in the scientific community, and how can they be addressed?

Intrinsically disordered proteins (IDPs) have been an area of focus in the field of protein science for several decades now. Initially considered anomalies in protein structure-function dogma, they've come to be recognized as key players in cellular processes. However, some misconceptions persist that potentially hinder the understanding and appreciation of their unique roles in biology. Let's examine some of these misconceptions and discuss how they might be addressed:

#### 1. Misconception: IDPs have no stable structure.

This is one of the most common misconceptions. IDPs do not adopt a unique, well-defined structure under physiological conditions, but this doesn't mean they're entirely devoid of structure. Many IDPs adopt partially structured conformations, such as random coils, pre-molten globules, and molten globules, and some transiently form secondary structure elements. IDPs can also adopt a specific 3D conformation upon binding to other molecules.

Addressing this misconception requires continued emphasis on the dynamic nature of protein structure, expanding the classic "structure-function" paradigm to include more flexible and adaptable molecules. It's also crucial to develop and

refine methods that can capture these transient conformations, like Nuclear Magnetic Resonance (NMR) spectroscopy, small-angle X-ray scattering (SAXS), and computational modeling techniques.

## **2. Misconception: IDPs are non-functional or less functional than structured proteins.**

Given the traditional understanding that a protein's function is tied to its specific structure, many assumed that IDPs would lack functional capabilities. However, IDPs are now known to participate in numerous biological processes, including signal transduction, transcriptional regulation, and protein recognition and binding.

To overcome this misconception, it's essential to continue exploring and documenting the varied functions of IDPs. The concept of "coupled folding and binding," where IDPs acquire structure upon interaction with their targets, highlights a unique mode of function that needs to be more widely recognized.

## **3. Misconception: IDPs are evolutionarily less conserved.**

This misconception arises from sequence-based conservation analysis, which often fails to capture the subtleties of IDP evolution. While their amino acid sequences may be less conserved, IDPs often retain specific features such as charge distribution, net charge, and amino acid composition, which are critical to their function and hence evolutionarily conserved.

Addressing this requires expanding our understanding of evolutionary conservation beyond just primary sequence to other structural and functional characteristics. Bioinformatic approaches need to take into account these features when analyzing IDP conservation.

## **4. Misconception: The lack of structure makes IDPs less "druggable".**

This belief stems from conventional drug design strategies targeting well-defined active sites in structured proteins. While it is true that targeting IDPs presents unique challenges, they also offer opportunities for novel therapeutic interventions. For example, molecules that modulate IDP interaction with binding partners or stabilize certain conformations could have therapeutic potential.

Addressing this misconception will involve innovative approaches to drug design that can account for the dynamic, multifaceted nature of IDPs. This might include methods that can capture multiple IDP states and novel screening techniques to identify molecules that interact with these states.

By continuing to expand our understanding of IDPs and by developing tools and strategies that embrace their unique characteristics, the scientific community can move past these misconceptions and harness the full potential of these fascinating proteins.

## **4. What are the most significant findings or breakthroughs in the study of intrinsically disordered proteins that have changed our understanding of protein structure and function?**

Intrinsically Disordered Proteins (IDPs) are proteins that lack a fixed or rigid 3D structure under physiological conditions, and this trait enables them to interact with various partners in multiple ways, demonstrating a high degree of functional versatility. The traditional "structure-function" paradigm in protein biochemistry posited that proteins have specific, well-defined structures that determine their functions. The emergence of IDPs has revolutionized this perception and established a new paradigm of "disorder-function".

Several significant findings and breakthroughs in the study of IDPs have been instrumental in reshaping our understanding of protein structure and function:

**1. Polyfunctionality:** One significant revelation from IDP studies is the concept of one protein being associated with multiple functions, also known as protein polyfunctionality or moonlighting. IDPs can adopt various structures or remain unstructured, allowing them to interact with multiple binding partners, and thus participate in a multitude of functional pathways.

**2. Regulation of signaling and regulation pathways:** Due to their ability to interact with a multitude of partners, IDPs are often involved in signal transduction and regulation processes. Their flexibility allows for precise modulation of these pathways, playing key roles in processes such as transcriptional regulation, cell cycle progression, and protein phosphorylation.

**3. Role in disease:** Numerous studies have revealed the involvement of IDPs in various diseases, including neurodegenerative diseases (like Alzheimer's and Parkinson's), cancer, cardiovascular diseases, and diabetes. The misfolding and aggregation of IDPs contribute to the pathogenesis of these diseases, offering new targets for therapeutic intervention.

**4. Post-translational modifications (PTMs):** IDPs are often subject to a wide variety of PTMs. These modifications can modulate the disorder/order state of the protein, affecting protein-protein interactions and cellular localization. Understanding how PTMs affect IDPs is leading to a more nuanced view of protein regulation and function.

**5. Protein design and engineering:** Insights from IDPs are changing the way we design proteins. Knowledge of how sequence dictates disorder and ordered states is being used to engineer novel proteins with desirable properties, such as specific binding characteristics or environmental responsiveness.

**6. Interplay between intrinsic disorder and protein evolution:** It's been shown that disordered regions of proteins evolve more rapidly than their structured counterparts, contributing to the evolution of new functions. This may help explain why intrinsic disorder is so prevalent in eukaryotic proteins.

In summary, the study of IDPs has profoundly changed our understanding of protein structure and function, underscoring the importance of protein dynamics and flexibility in biological processes. The inherent flexibility of IDPs allows them to be key players in diverse cellular processes, participate in the regulation of complex networks, and adapt to evolutionary pressures. This knowledge is fundamentally reshaping biomedical research and holds great potential for developing innovative therapeutic strategies.

## **5. How can the study of intrinsically disordered proteins contribute to a more comprehensive understanding of protein-protein interactions and cellular signaling networks?**

The study of intrinsically disordered proteins (IDPs) has the potential to vastly expand our understanding of protein-protein interactions (PPIs) and cellular signaling networks. This is due to the unique properties and functions of IDPs that deviate from the traditional structure-function paradigm in molecular biology.

Traditionally, proteins are thought to function according to their folded 3D structure - the so-called 'lock and key' model. However, IDPs challenge this view as they lack a stable 3D structure in their native state. They are highly dynamic and can adopt different conformations, allowing them to engage in a multitude of interactions. This ability to morph into various shapes gives IDPs the flexibility to interact with many different partners and participate in numerous signaling pathways.

There are several ways that studying IDPs can contribute to a more comprehensive understanding of PPIs and cellular signaling networks:

**1. Increased Complexity of Interaction Networks:** The plasticity of IDPs allows them to engage in what is known as 'one-to-many' and 'many-to-one' interactions. In 'one-to-many' interactions, a single IDP can bind to multiple partners depending on the context, increasing the complexity of the interaction network. On the other hand, 'many-to-one' interactions allow multiple IDPs to compete for a single partner, which can act as a regulatory mechanism. Studying these interactions can offer insights into how proteins communicate and interact within the cell.

**2. Regulation of Cellular Processes:** IDPs often act as hubs in signaling networks, coordinating the flow of information within a cell. By regulating the interactions of other proteins, IDPs can control cellular processes such as transcription, translation, and signal transduction. Understanding these regulatory mechanisms can shed light on the complex orchestration of cellular activities.

**3. Dynamic Protein Complexes:** IDPs enable the formation of dynamic protein complexes that can quickly assemble and disassemble in response to cellular signals. This allows cells to respond rapidly to changes in their environment, enabling swift changes in cellular behavior. Studying these dynamic complexes can enhance our understanding of how cells adapt to different conditions.

**4. Disease Association:** IDPs are implicated in various diseases, including cancer, neurodegenerative disorders, and cardiovascular diseases. This is often due to alterations in their interactions or conformations. Therefore, studying IDPs can provide insights into disease mechanisms and potentially lead to the development of new therapeutic strategies.

In summary, the study of intrinsically disordered proteins can significantly advance our understanding of protein-protein interactions and cellular signaling networks. By revealing new types of interactions and regulatory mechanisms, IDPs offer a more nuanced view of cellular behavior and disease processes.

## **6. What are the roles of intrinsically disordered proteins in liquid-liquid phase separation and biogenesis of membrane-less organelles?**

Intrinsically disordered proteins (IDPs) are critical players in cellular phenomena known as liquid-liquid phase separation (LLPS) and the biogenesis of membrane-less organelles.

LLPS refers to the process by which a homogenous solution of molecules separates into two coexisting phases, much like oil droplets in water. In a cellular context, this can lead to the formation of dynamic, droplet-like structures called biomolecular condensates. Membrane-less organelles such as stress granules, P-bodies, and the nucleolus are examples of these condensates.

The disorder and flexibility of IDPs allow them to take on various conformations and interact with many different partners, facilitating their crucial role in these processes.

**1. Multivalent Interactions:** IDPs are known for their ability to establish multivalent interactions due to the high concentration of interaction motifs within their structure. This facilitates the formation of dynamic networks of proteins and other molecules that can lead to phase separation.

**2. Promotion of Liquid-Liquid Phase Separation:** IDPs can drive LLPS by interacting with each other and with other proteins in a specific and selective manner. The concentration of these IDPs within a certain cellular compartment can result in the formation of a separate liquid phase.

**3. Conformational Flexibility:** The lack of a fixed 3D structure in IDPs allows them to adopt many different shapes, enabling diverse interactions and dynamic responses to changes in the cellular environment. This flexibility helps maintain the fluidity of biomolecular condensates and is integral to the biogenesis and function of membrane-less organelles.

**4. Regulation of Organelle Properties:** IDPs can influence the physical properties of membrane-less organelles, such as their viscosity, density, and propensity to fuse or dissolve. They can also control the selective permeability of these organelles, influencing which molecules can enter or exit.

**5. Response to Cellular Conditions:** The phase separation behavior of IDPs can be modulated by cellular signals, post-translational modifications, or changes in environmental conditions (e.g., temperature, pH), enabling dynamic regulation of membrane-less organelle formation.

Through these roles, IDPs contribute to the organization of cellular contents, the response to stress, and the regulation of biochemical reactions. They are integral to the dynamic and adaptable nature of cells. However, malfunctions in these processes can also contribute to disease states, including neurodegenerative diseases like ALS and Alzheimer's disease, which highlights the importance of further research in this area.



## 7. How can the development of novel experimental techniques specifically tailored to study intrinsically disordered proteins advance our understanding of their structure, function, and interactions?

The development of novel experimental techniques to study intrinsically disordered proteins (IDPs) could significantly advance our understanding of these proteins in numerous ways.

**1. Structure determination:** IDPs lack a fixed three-dimensional structure under physiological conditions, which has traditionally made them challenging targets for conventional structural biology methods such as X-ray crystallography or standard nuclear magnetic resonance (NMR) spectroscopy. Novel experimental techniques could potentially be developed to overcome these challenges and provide high-resolution structural information on these elusive proteins. For instance, enhanced NMR techniques adapted for IDPs or new spectroscopic methods could yield more dynamic structural information, enabling us to understand their "disordered" structures better. Such information could also lead to improved computational models for IDPs.

**2. Function elucidation:** Many IDPs are involved in critical biological processes, such as transcription, translation, and signal transduction. However, the lack of stable structure often complicates efforts to understand their functional roles. New experimental approaches could help elucidate the mechanisms by which these proteins function, even in the absence of a stable three-dimensional structure. For example, developing techniques to visualize IDPs in live cells, or improved in vitro reconstitution systems, could help us track the real-time behavior and functional roles of these proteins.

**3. Interaction mapping:** IDPs often function through interactions with other proteins, nucleic acids, or small molecules, acting as "hubs" in cellular interaction networks. However, these interactions can be transient and difficult to detect using traditional interaction mapping techniques. Novel techniques for studying protein-protein and protein-nucleic acid interactions, perhaps utilizing advanced biophysical or biochemical approaches, could allow us to capture these transient interactions and further elucidate the roles of IDPs in cellular signaling and regulation.

**4. Disease linkages:** Many IDPs have been implicated in human diseases, including neurodegenerative disorders like Alzheimer's and Parkinson's diseases. Novel experimental techniques could be pivotal in understanding the role of IDPs in these disease contexts. For example, high-throughput screening methods might identify small molecules that interact with IDPs, potentially leading to new therapeutic strategies.

**5. Stability and degradation:** IDPs have different stability and degradation behaviors compared to structured proteins. Novel techniques to study these aspects could help in understanding the life cycle of IDPs and their response to cellular stresses, thus shedding light on the role of protein homeostasis in health and disease.

**6. Post-translational modifications:** IDPs are often subject to various post-translational modifications, which can influence their function, interactions, and degradation. New methods for detecting and quantifying these modifications could provide more in-depth insights into the dynamic nature of IDPs.

The development of these novel experimental techniques would therefore not only help in filling our current gaps in knowledge about IDPs but also open up new horizons for research in protein science, cell biology, and biomedical research.

## 8. How can incorporating the study of intrinsically disordered proteins into drug discovery efforts lead to the identification of novel therapeutic targets and strategies?

Intrinsically disordered proteins (IDPs) and intrinsically disordered regions (IDRs) within proteins are a class of proteins that do not possess a well-defined three-dimensional structure under physiological conditions. Unlike traditional drug targets that rely on rigid, well-structured active sites, IDPs and IDRs present unique conformational flexibility and multifunctionality, rendering them potentially valuable in drug discovery efforts. Here are several ways in which the study of these proteins can contribute to identifying novel therapeutic targets and strategies:

**1. Expanding the "druggable" proteome:** Traditionally, the "druggable" proteome is thought to include only well-folded proteins with defined pockets or grooves for small molecule binding. IDPs and IDRs significantly increase the range of possible targets because they can potentially interact with many different partners in a highly specific yet low-affinity manner. This opens up an entirely new landscape of targets that have been largely untapped in the traditional drug discovery paradigm.

**2. Targeting protein-protein interactions (PPIs):** IDPs and IDRs often mediate PPIs, many of which are involved in crucial cellular processes and disease progression. For instance, they often act as molecular hubs in protein interaction networks, coordinating multiple pathways simultaneously. By targeting these interfaces, one can potentially disrupt or modulate disease-related processes in new ways.

**3. Tackling "undruggable" targets:** IDPs/IDRs can contribute to novel strategies for tackling previously "undruggable" targets. For example, IDRs in transcription factors can modulate their interactions with DNA and other proteins, and these have often been classified as "undruggable". However, by targeting the IDRs, one could potentially modulate the activity of these proteins and open up new avenues for therapeutic intervention.

**4. Multifunctionality and plasticity:** The intrinsic disorder of IDPs/IDRs imparts a multifunctionality to these proteins. They can participate in diverse interactions and adopt different conformations depending on the interacting partner. Such plasticity could enable the design of drugs that can modulate multiple pathways simultaneously or create multi-target drugs.

**5. Role in disease progression:** IDPs and IDRs have been implicated in numerous diseases, including neurodegenerative diseases like Alzheimer's, where they can form toxic aggregates, and in cancers, where they can disrupt normal cellular function. Understanding the biology of these proteins and their roles in disease can help identify novel therapeutic strategies.

In conclusion, incorporating the study of intrinsically disordered proteins in drug discovery has the potential to considerably expand the therapeutic target space, with possible applications in a wide array of diseases. It represents a paradigm shift in how we approach drug discovery, offering new strategies for tackling diseases that have remained elusive under the traditional model. However, successfully targeting these proteins also presents significant challenges, including understanding the complexity of their interactions and behaviors, and developing tools and methods to specifically target these unique proteins.

## **9. How can we improve the acceptance and understanding of intrinsically disordered proteins in the scientific community and promote their importance in the biological sciences?**

Intrinsically disordered proteins (IDPs) represent a paradigm shift in our understanding of protein function, far removed from the traditional structure-function paradigm. These proteins lack a fixed or stable structure under physiological conditions and yet play crucial roles in various biological processes, including cell signaling, regulation, and disease pathogenesis. However, the acceptance and understanding of IDPs in the scientific community can be further improved, and their importance in the biological sciences promoted through several strategies:

**1. Education and Training:** Incorporating knowledge about IDPs into curriculums at undergraduate and graduate levels can ensure early exposure to this field. Hands-on laboratory exercises could also be designed to illustrate the unique properties and functions of IDPs.

**2. Scientific Meetings and Conferences:** Organizing dedicated symposia, conferences, or sessions within broader conferences focusing on IDPs can create an avenue for experts in the field to present their work, spark interest, and forge collaborations. Webinars and online discussions can also be a platform for expanding the reach of these discussions.

**3. Special Journal Issues and Reviews:** Encouraging and publishing review articles and special issues in scientific journals dedicated to IDPs can help to consolidate and communicate the latest findings in this field. It also allows other researchers to gain a deeper understanding of the significance of IDPs in various biological contexts.

**4. Funding Opportunities:** Agencies that provide research funding should be made aware of the importance of IDPs, which could prompt them to create dedicated funding lines for IDP research. This would allow for more extensive and detailed studies, ultimately propelling the field forward.

**5. Collaborative Research:** Promoting collaborations between experimental and computational researchers can accelerate the progress in this field. Given that IDPs are difficult to study using traditional experimental techniques, collaborations with computational biologists and bioinformaticians who specialize in predicting and modeling IDP behaviors could prove immensely beneficial.

**6. Public Science Communication:** Increasing public awareness about the relevance of IDPs, especially in disease contexts, could indirectly improve their acceptance in the scientific community. This could be achieved through science communication in the form of public talks, science fairs, articles in popular science magazines, and social media outreach.

**7. Standardization of Nomenclature and Methodologies:** There's a need for consensus in the nomenclature and experimental methodologies for studying IDPs to avoid confusion and to facilitate better comprehension and communication of research findings.

**8. Technological Advances:** Encouraging technological innovation in methods to study IDPs can overcome some of the challenges associated with studying these dynamic proteins. This can lead to breakthroughs that drive the field forward.

By implementing these strategies, we can hope to improve the acceptance and understanding of intrinsically disordered proteins, paving the way for major discoveries in this unique and exciting field of biology.

#### **10. What are the future directions and challenges in the field of intrinsically disordered proteins research, and how can the scientific community work together to address these challenges?**

Intrinsically disordered proteins (IDPs) are a class of proteins that lack a fixed or ordered three-dimensional structure. They can exist in multiple conformations and their structure is often context-dependent, which is a stark departure from the traditional structure-function paradigm of molecular biology. As such, they present a significant frontier in protein research, with numerous challenges and opportunities for future exploration. Here are a few key areas where future research could be directed:

**1. Structural Determination:** Despite advances in techniques such as nuclear magnetic resonance (NMR) spectroscopy and cryo-electron microscopy, determining the structures of IDPs remains challenging due to their dynamic and flexible nature. We still need more precise, high-resolution techniques to capture the range of conformations that IDPs can adopt.

**2. Function Prediction:** Traditional sequence-to-structure-to-function paradigms don't work well for IDPs. We need to develop new models and predictive tools that can accurately predict IDP function from their sequences and dynamic structural data.

**3. IDP-Drug Interactions:** Given that many IDPs are involved in disease pathways (cancer, neurodegenerative diseases, etc.), understanding how drugs interact with these proteins could pave the way for new therapeutic strategies. Designing drugs to target these "moving targets" is a significant challenge.

**4. Role in Cellular Networks:** IDPs often participate in complex interaction networks within the cell, acting as 'hubs' due to their ability to adopt multiple conformations. We need to better understand how these proteins integrate into cellular networks and modulate cellular functions.



**5. Post-translational Modifications:** Many IDPs undergo a range of post-translational modifications, which can modulate their function and interactions. Understanding these modifications and their effects on IDPs is another important area of research.

To address these challenges, the scientific community needs to adopt a multi-disciplinary approach, integrating knowledge and techniques from biochemistry, biophysics, molecular biology, and computational biology, among other fields. Here are a few strategies that could be helpful:

**1. Collaborative Efforts:** The scientific community could foster international collaborations and consortiums to share data, resources, and expertise. This could include creating shared databases of IDP structures and functions, and organizing regular symposia and conferences to share findings and discuss challenges.

**2. Technological Innovation:** Continuous investment in the development of new experimental and computational technologies will be key. This could include new methods for high-resolution structural determination of IDPs, as well as machine learning algorithms for predicting IDP function and interactions.

**3. Training and Education:** The next generation of scientists needs to be trained in the complexities of IDP research. This could involve creating specialized courses and workshops on IDPs, and integrating IDP research into broader biology and biochemistry curricula.

**4. Interdisciplinary Research:** Encouraging interdisciplinary research will be key to understanding the complex nature of IDPs. This could include collaborations between experimental and computational biologists, or between protein scientists and clinicians to translate research findings into clinical applications.

By working together in these ways, the scientific community can continue to unravel the mysteries of intrinsically disordered proteins, paving the way for new insights into protein biology and new strategies for treating disease.

## USE CASES

### 11. Recommend an experimental procedure for characterizing the folding landscape and structural transitions of an intrinsically disordered protein using biophysical techniques.

Characterizing the folding landscape and structural transitions of an intrinsically disordered protein (IDP) can be a challenging task due to the dynamic nature of these proteins. However, several biophysical techniques can be employed to perform this characterization. Here, I will suggest an experimental procedure that combines various methods for comprehensive insight.

- 1. Nuclear Magnetic Resonance (NMR) Spectroscopy:** As a primary technique, NMR is invaluable for structural studies of IDPs due to its ability to provide residue-specific information on dynamics and structure.  
Procedure:
  - You need to express and purify your protein of interest. Usually, the protein is expressed in *E. coli* and then purified.
  - Label your protein with stable isotopes (typically  $^{15}\text{N}$  and/or  $^{13}\text{C}$ ) for the NMR experiments.
  - Acquire a suite of multidimensional NMR experiments to obtain backbone and sidechain assignments. These include HNCA, HNCACB, CBCA(CO)NH, HCCH-TOCSY, (HB)CB(CGCD)HD, and (HB)CB(CGCDCE)HE for  $^{13}\text{C}$  and  $^{15}\text{N}$  labeled proteins.
  - Obtain relaxation dispersion experiments to characterize conformational exchanges on micro- to millisecond timescales.
  - Chemical shift values obtained from these experiments can be used to calculate secondary structure propensity (SSP) scores that indicate any transiently formed secondary structure elements.
- 2. Circular Dichroism (CD) Spectroscopy:** CD is excellent for tracking changes in secondary structure content.  
Procedure:
  - Prepare a protein solution at a suitable concentration, typically in the low microM range.

- Perform CD scans across a wavelength range from 190 nm to 260 nm.
  - Monitor changes in the CD spectrum upon varying conditions such as temperature or ligand concentration. Changes can indicate folding/unfolding transitions or ligand-induced folding.
- 3. Fluorescence Spectroscopy:** Fluorescence can be used to monitor changes in the local environment of intrinsic fluorophores (tryptophan residues) or extrinsic fluorophores (fluorescent dyes).  
Procedure:
- If your protein has tryptophan residues, you can directly monitor their fluorescence. If not, you can engineer a tryptophan residue at a site of interest or use an extrinsic fluorescent dye.
  - Measure the fluorescence emission spectrum upon excitation at an appropriate wavelength.
  - Monitor changes in fluorescence intensity or wavelength of maximum emission (which reflects the local environment) upon varying conditions.
- 4. Small Angle X-Ray Scattering (SAXS):** SAXS can provide low-resolution structural information about proteins in solution and is particularly useful for IDPs which don't adopt a single defined structure.  
Procedure:
- Prepare a series of protein solutions at different concentrations.
  - Collect SAXS data at each concentration.
  - Analyze the data to calculate parameters like the radius of gyration ( $R_g$ ) and the pairwise distance distribution function (PDDF) which can provide insight into the overall size and shape of the protein ensemble.
- 5. Molecular Dynamics (MD) Simulations:** MD simulations can complement experimental results and provide detailed insights into the conformational ensemble of an IDP.  
Procedure:
- Set up an initial model of your protein based on experimental data, if available.
  - Perform simulations under appropriate conditions using an appropriate force field.
  - Analyze the simulation trajectories to explore the conformational space accessible to the protein and characterize structural transitions.

In addition to the above, other techniques like mass spectrometry (MS), single molecule FRET, and hydrogen/deuterium exchange (HDX) could be employed depending upon the question at hand. Combining results from multiple techniques will allow for a comprehensive characterization of the folding landscape and structural transitions of the IDP. Each technique provides a different perspective and together they will give a more complete picture of the conformational behavior of the protein.

## 12. Propose a computational approach to simulate the conformational behavior and dynamics of intrinsically disordered proteins.

Simulating the conformational behavior and dynamics of intrinsically disordered proteins (IDPs) is a challenging task due to the structural heterogeneity of these proteins. Here, I propose a multi-tiered computational approach that combines several methodologies to handle different scales of the problem:

**1. Coarse-Grained (CG) Molecular Dynamics (MD) Simulations:** Because of the large number of conformations that IDPs can assume, a full-atom simulation is often computationally expensive and impractical. Hence, we start with CG MD simulations. In this approach, a group of atoms is treated as a single particle (bead), significantly reducing the complexity of the system. CG MD simulations allow us to explore a larger conformational space within a feasible timescale and provide insights into the global dynamics and large-scale conformational changes of IDPs.

**2. Transition Path Sampling (TPS):** For certain interesting events, like the transition from one conformational state to another, rare event sampling methods like TPS can be used. TPS generates an ensemble of transition paths, which helps to calculate rate constants and identify the most probable transition states and pathways. This can provide critical insights into the dynamics of conformational changes in IDPs.

**3. Machine Learning (ML) Algorithms:** Machine learning can be employed to predict the conformational ensemble of IDPs from sequence alone. Techniques like deep learning (using architectures like convolutional neural networks or recurrent neural networks) can be trained on existing experimental or simulation data of IDPs to predict their structural propensities. The predicted ensemble can then be used as an initial condition or as constraints in further simulations.

**4. All-Atom Molecular Dynamics (AA MD) Simulations:** For detailed and fine-grained investigation of specific states or regions, AA MD simulations can be employed. These simulations can offer atomic-level details of the structure, including side-chain conformations and specific protein-ligand or protein-protein interactions. However, due to the high computational cost, they are usually performed on a small scale or for short durations.

**5. Markov State Models (MSMs):** MSMs can be built from the trajectory data generated by the CG MD and AA MD simulations. These models help to elucidate the long-timescale dynamics of the system by representing the conformational space as a network of states, where the transitions between states follow Markovian properties. MSMs can be used to calculate kinetic quantities and identify the key metastable states and the pathways between them.

**6. Integration of Simulation and Experimental Data:** The ultimate verification of any simulation study is the comparison with experimental data. Therefore, we need to continuously validate and refine our computational models using experimental data from techniques like NMR, SAXS, and FRET. This will allow us to improve the accuracy of our models and make reliable predictions about the conformational behavior and dynamics of IDPs.

By combining these methodologies, we can create a robust computational framework to simulate the complex behavior of intrinsically disordered proteins, while ensuring a balance between computational cost and detail level.

### 13. Design an experimental protocol to demonstrate the involvement of intrinsically disordered proteins in liquid-liquid phase separation.

**Title:** An In Vitro Investigation of the Role of Intrinsically Disordered Proteins in Liquid-Liquid Phase Separation.

#### Objective:

The objective of this experiment is to ascertain the involvement of IDPs in LLPS by examining the behavior of a well-characterized IDP during phase separation under controlled conditions.

#### Materials Required:

1. Well-characterized IDP (for example, FUS or hnRNPA1)
2. Cell lysates or recombinant proteins
3. Phase separation inducing agents (like salts, crowding agents, etc.)
4. Microscope (preferably Confocal or Super-resolution microscopy)
5. Fluorescent labeling reagents
6. Circular dichroism (CD) spectrometer
7. Differential scanning calorimetry (DSC)

#### Methodology:

##### Step 1 - Protein Preparation:

Obtain your IDP of interest. You may need to express and purify it recombinantly in an expression system like E. coli, or you can purchase it if commercially available. Ensure the protein is of high purity and free of any contaminants which may affect the LLPS process.

##### Step 2 - Fluorescent Labeling:

Label your protein with an appropriate fluorescent dye for visualization. Ensure the label does not significantly alter the protein's properties or disrupt any of the disordered regions.

**Step 3 - Induction of Phase Separation:**

Perform in vitro phase separation assays. Adjust the environmental conditions (such as temperature, concentration, pH, and salinity) that induce LLPS in your protein solution. You may want to use crowding agents or salt solutions to mimic cellular conditions.

**Step 4 - Microscopic Analysis:**

Visualize the protein under the microscope at different time points to monitor phase separation. Use high-resolution imaging techniques to visualize and quantify the formation of liquid droplets.

**Step 5 - CD and DSC:**

Use circular dichroism to analyze the secondary structure of your protein both before and after phase separation. If phase separation is driven by structural transitions, you should see a change in the CD spectrum.

You can also use differential scanning calorimetry to detect any changes in heat capacity associated with phase separation. This will give additional information about any conformational changes in the protein.

**Expected Results:**

If the IDP is involved in LLPS, upon induction of phase separation, you should be able to visualize the formation of liquid droplets. Also, any changes in the protein's structure detected by CD or DSC would indicate a possible involvement of protein conformational change in the phase separation process.

**Conclusion:**

The results of this experiment should provide evidence for or against the role of your IDP in LLPS. You will need to interpret the results in the context of the specific protein and conditions used. Further studies, possibly involving mutant versions of the protein, may be needed to fully understand the underlying mechanisms.

This is a simplified protocol and may need to be adjusted based on the specific requirements of your experiment. Also, remember to include proper controls, such as proteins known not to undergo LLPS under the same conditions, to validate your results.

## **14. Develop a pipeline for integrating multiple experimental and bioinformatics datasets to identify novel intrinsically disordered protein candidates and prioritize their functional characterization.**

The task of integrating multiple experimental and bioinformatics datasets to identify novel intrinsically disordered protein (IDP) candidates and prioritize their functional characterization involves several steps. Here is a potential pipeline:

**1. Data Collection and Standardization:**

Begin by identifying and collecting relevant datasets. These could include high-throughput sequencing data, protein interaction data, protein structure databases, and any other datasets that may contain information about protein structures. Ensure all data is standardized, clean, and ready for downstream analyses. Data should be as diverse as possible to account for variations in organisms, environmental conditions, and experimental methods.

**2. Initial Identification of Intrinsically Disordered Proteins (IDPs):**

Implement predictive algorithms that use machine learning techniques to predict intrinsically disordered regions (IDRs) within proteins. For instance, tools such as PONDR, DisProt, MobiDB, or D2P2. They typically use physicochemical

properties of the amino acid sequence, evolutionary information, or sequence motifs to make predictions. Remember to validate these findings with experimental data when available.

### **3. Data Integration and Cross-validation:**

Combine all available datasets to form a unified dataset with various types of data for each protein. Data integration should be done in a way that allows you to cross-validate findings across datasets. This could involve integrating proteomics data, transcriptomics data, genomics data, and others. You can use ensemble methods or develop a scoring system to prioritize proteins with high confidence predictions.

### **4. Network Analysis:**

Conduct protein-protein interaction network analyses using available data. By investigating the roles of potential IDPs within these networks, you can begin to make predictions about their potential functions. Network-based metrics such as node degree, betweenness centrality, and community detection algorithms can aid this process.

### **5. Functional Annotation:**

Use bioinformatics tools to annotate predicted IDPs with potential functions. Tools such as BLAST for sequence similarity, GO term enrichment analysis for functional categories, or KEGG for pathways can be helpful. Remember that IDPs may be involved in multiple functions, and so broad-spectrum functional analysis is important.

### **6. Prioritization for Experimental Validation:**

Once you've made preliminary functional predictions for your novel IDP candidates, it's time to prioritize them for experimental validation. Prioritization can be based on multiple factors including:

- The confidence level of your computational predictions.
- The potential impact of the protein's predicted function(s).
- The novelty of the predicted IDP (if it's an uncharacterized protein or has an unusual disorder propensity).
- The feasibility of experimental characterization (availability of reagents, ease of culturing the organism, etc.).

### **7. Experimental Validation:**

Finally, conduct experimental assays to validate the predicted IDPs and their functions. Common techniques for studying IDPs include nuclear magnetic resonance (NMR) spectroscopy, circular dichroism (CD) spectroscopy, and various other biophysical techniques. Functional validation can involve gene knockout studies, protein-protein interaction assays, or cell-based assays, depending on the predicted function.

### **8. Iteration and Refinement:**

Finally, the entire process should be iterative. After experimental validation, the results should be used to refine the predictive models and improve the pipeline.

Following this pipeline should give a good start on identifying novel intrinsically disordered protein candidates and prioritizing their functional characterization. Remember that each of these steps will require careful analysis and may require customizing based on the specific datasets and resources available.

## **15. Outline a research plan to elucidate the molecular mechanisms underlying the aggregation and pathological behavior of disease-associated intrinsically disordered proteins, considering both in vitro and cellular models.**

Research Plan to Elucidate the Molecular Mechanisms of Disease-Associated Intrinsically Disordered Proteins (IDPs)

### **I. Literature Review**



An extensive literature review will be performed to understand what is already known about IDPs in relation to diseases. This will include a review of methods previously used to study IDPs, as well as a deep dive into the particular diseases thought to be related to IDP dysfunction.

## II. Identification of Candidate IDPs

We will select a number of IDPs that have been associated with diseases for investigation. This will include IDPs related to Alzheimer's disease, Parkinson's disease, and other neurodegenerative disorders, but may also include proteins implicated in other conditions.

## III. In Vitro Studies

1. **Protein Expression and Purification:** The IDPs will be expressed in suitable systems (like E.coli yeast), and purified using standard protein purification techniques (like affinity chromatography).
2. **Aggregation Studies:** The aggregation propensity of these IDPs will be studied using techniques such as Thioflavin T (ThT) assay, Dynamic Light Scattering (DLS), Atomic Force Microscopy (AFM), and Transmission Electron Microscopy (TEM).
3. **Structural Studies:** Techniques like Nuclear Magnetic Resonance (NMR) spectroscopy, Circular Dichroism (CD) spectroscopy, and Fourier Transform Infrared (FTIR) spectroscopy will be used to study the conformational dynamics of these IDPs before and after aggregation.
4. **Molecular Dynamics Simulations:** Computational tools will be used to investigate the IDPs at the atomistic level, helping us to understand how these proteins interact and aggregate at a molecular level.

## IV. Cellular Models

1. **Cell Culture:** The chosen IDPs will be expressed in appropriate cellular models. This could include neuronal cell lines for neurodegenerative disease-related IDPs, for example.
2. **Subcellular Localization and Aggregation Studies:** Immunofluorescence microscopy will be used to study the subcellular localization of these proteins and their aggregation in cells.
3. **Cell Viability and Apoptosis Assays:** These tests will help to determine whether or not the aggregation of the IDPs is cytotoxic.
4. **Proteostasis Network Investigation:** Understanding the interplay between IDPs and the cell's protein homeostasis machinery (like chaperones, proteasome, and autophagy) will shed light on how cells cope with misfolded and aggregated proteins.

## V. Data Analysis and Interpretation

Collected data will be analyzed and interpreted in the context of the respective diseases. The aim is to elucidate molecular mechanisms underlying the pathological behavior of IDPs.

## VI. Knowledge Dissemination

Findings will be published in peer-reviewed journals and presented at relevant conferences to share the research with the wider scientific community. This will hopefully prompt further studies and could even lead to potential therapeutic targets.

## VII. Future Directions

Based on the insights gained from this study, future research directions could include investigating potential therapeutic strategies targeting the identified molecular mechanisms of IDP aggregation and pathology. Additionally, the research could be expanded to include more IDPs and a wider variety of diseases.

**Prompt:***"QUESTION HERE"*

*Please assume the role of an expert and answer this question to the best of your ability. The reader should not be able to know how the answer was generated. Do not mention any limitations on your ability to access data.*

### **1. How has the traditional "one structure, one function" paradigm limited our understanding of protein functionality and roles of proteins in biological systems?**

The traditional "one structure, one function" paradigm has indeed played a crucial role in our understanding of protein functionality over the years. However, it is increasingly becoming clear that this paradigm has its limitations and may not fully capture the complexity of protein roles in biological systems. Let me explain why.

Firstly, the traditional paradigm assumes that a protein's structure directly dictates its function. According to this view, a particular protein structure corresponds to a specific function, and different structures imply different functions. While this holds true for many proteins, it oversimplifies the reality of protein functionality. Proteins can exhibit structural flexibility and undergo conformational changes, allowing them to perform multiple functions or participate in diverse biological processes. These structural dynamics can occur in response to environmental stimuli, ligand binding, post-translational modifications, or protein-protein interactions. By considering only a single structure-function relationship, we may overlook the multifaceted nature of protein functionality.

Secondly, the "one structure, one function" paradigm often fails to account for protein moonlighting, a phenomenon where a single protein serves multiple unrelated functions. Moonlighting proteins possess distinct active sites or regions within their structure, enabling them to perform different tasks independently. For example, a metabolic enzyme might also function as a transcription factor or a chaperone under certain conditions. These additional roles are not apparent when solely examining the protein's primary structure and can lead to unexpected functions and complexities.

Thirdly, proteins can interact with a multitude of binding partners in complex biological networks. These interactions are critical for various cellular processes, including signaling pathways and regulatory networks. However, the traditional paradigm tends to overlook the role of protein-protein interactions in determining protein functionality. A protein's function can be modulated by its interactions with other proteins, cofactors, or nucleic acids. Therefore, considering the interactions and dynamics of proteins within cellular contexts provides a more comprehensive understanding of their roles and functional significance.

Lastly, the traditional paradigm often focuses on individual proteins in isolation, neglecting the importance of protein networks and systems biology. Biological systems are characterized by intricate networks of proteins, where the behavior and function of one protein can depend on its interactions with many others. Proteins work in concert to carry out complex cellular processes, and their roles are often interdependent within these systems. A holistic approach that considers the interactions and interconnectivity of proteins can uncover emergent properties and reveal the collective functionality of the entire system.

In summary, while the traditional "one structure, one function" paradigm has provided valuable insights into protein functionality, it has limitations. The multifunctionality of proteins, their structural dynamics, protein-protein interactions, and the importance of systems-level understanding all necessitate a broader perspective to fully comprehend the complexity of protein functionality in biological systems. Advances in experimental techniques, computational methods, and integrative approaches are gradually expanding our knowledge beyond the confines of this traditional paradigm.

### **2. How do intrinsically disordered proteins challenge the structure-function paradigm, and what evidence supports their importance in cellular processes?**

Intrinsically disordered proteins (IDPs) present a fascinating challenge to the traditional structure-function paradigm in protein biology. Unlike the classical understanding of proteins, which states that a well-defined three-dimensional structure is necessary for their function, IDPs lack a stable structure under physiological conditions and exist as

dynamic ensembles of conformations. This inherent disorder defies the conventional notion that structure dictates function and necessitates a paradigm shift in our understanding of protein biology.

IDPs play crucial roles in a wide range of cellular processes, and their functional importance is supported by various lines of evidence. One key piece of evidence is the abundance of IDPs in proteomes across different organisms. It has been estimated that approximately one-third to one-half of eukaryotic proteins contain regions of intrinsic disorder. This prevalence suggests that IDPs have functional significance and cannot be dismissed as mere artifacts or non-functional protein remnants.

Additionally, experimental studies have revealed that IDPs exhibit remarkable functional versatility. They are involved in numerous vital cellular processes, such as signaling, transcriptional regulation, cell cycle control, and molecular recognition. IDPs often function as molecular hubs, interacting with multiple protein partners and participating in complex regulatory networks. Their intrinsic disorder allows for flexibility and adaptability, enabling them to engage in transient interactions, undergo conformational changes, and act as molecular switches.

Furthermore, emerging evidence highlights the specific structural features and mechanisms through which IDPs accomplish their functions. Techniques such as nuclear magnetic resonance spectroscopy, small-angle X-ray scattering, and single-molecule fluorescence spectroscopy have provided insights into the dynamic and heterogeneous nature of IDPs. These studies have demonstrated that IDPs can adopt different conformations upon binding to their interaction partners, a phenomenon known as coupled folding and binding. This process allows IDPs to undergo disorder-to-order transitions and adopt a specific structure upon binding, enabling them to modulate protein-protein interactions and regulate cellular processes.

Moreover, computational approaches, including bioinformatics analysis and molecular dynamics simulations, have contributed to our understanding of IDPs. These methods have helped identify sequence motifs and characteristics associated with intrinsic disorder, as well as predict the presence of disorder in protein sequences. These computational tools have been validated by experimental data and have further supported the functional importance of IDPs in cellular processes.

In summary, intrinsically disordered proteins challenge the traditional structure-function paradigm by demonstrating that proteins can be functional in the absence of a well-defined structure. The abundance of IDPs in proteomes, their involvement in critical cellular processes, and the presence of specific structural features and mechanisms all provide compelling evidence for the importance of IDPs in the intricate web of cellular biology. Recognizing the functional significance of IDPs opens up new avenues of research and broadens our understanding of the complexity of protein function and regulation.

### 3. What are some misconceptions about intrinsically disordered proteins that persist in the scientific community, and how can they be addressed?

Misconceptions about intrinsically disordered proteins (IDPs) indeed persist within the scientific community, despite significant advancements in our understanding of their unique properties and functional roles. Here, I will address a few common misconceptions and propose ways to rectify them:

#### 1. **Misconception:** IDPs lack structure and are functionally unimportant.

**Reality:** IDPs exhibit high conformational flexibility and lack a well-defined three-dimensional structure, but they play crucial roles in various biological processes. They are involved in signaling, regulation, and protein-protein interactions, among other functions.

Addressing the misconception: Researchers can emphasize the functional relevance of IDPs by providing compelling evidence through experiments and case studies. They can demonstrate how IDPs contribute to complex cellular processes and highlight specific examples where IDPs act as hubs for protein interactions, mediate molecular recognition, or undergo disorder-to-order transitions upon binding.

#### 2. **Misconception:** IDPs are inherently disordered and lack any functional motifs.

**Reality:** While IDPs lack a stable structure, they often contain short linear motifs or regions with specific conformations that mediate their interactions and functions. These motifs, such as molecular recognition features (MoRFs), disordered binding loops, or coiled-coil domains, provide functional elements within the larger disordered context.

Addressing the misconception: Scientists can investigate and characterize the presence of functional motifs within IDPs using techniques like bioinformatics analysis, structural prediction algorithms, and experimental approaches such as NMR spectroscopy or X-ray crystallography. By identifying and highlighting these functional elements, researchers can demonstrate that disorder does not equate to complete lack of structure or function.

### **3. Misconception:** IDPs are unimportant for drug discovery and therapeutic targeting.

**Reality:** IDPs are increasingly recognized as potential targets for drug discovery due to their involvement in various diseases, including cancer, neurodegenerative disorders, and viral infections. Their dynamic nature and accessibility for binding make them attractive targets for small molecules or peptide-based therapeutics.

Addressing the misconception: Researchers can showcase successful examples of targeting IDPs in drug discovery, including the development of small molecules or peptides that modulate IDP interactions or stability. Additionally, they can highlight the growing number of computational tools and approaches specifically designed for predicting and targeting IDPs, underscoring the potential therapeutic opportunities that these proteins present.

Addressing these misconceptions requires a combination of rigorous scientific investigation, the dissemination of up-to-date research findings, and effective communication within the scientific community. Collaborative efforts, conferences, and workshops focused on IDP research can facilitate knowledge exchange, encouraging researchers to challenge and revise outdated assumptions. Ultimately, a comprehensive understanding of IDPs will lead to further discoveries and advancements in our understanding of these fascinating biomolecules.

## **4. What are the most significant findings or breakthroughs in the study of intrinsically disordered proteins that have changed our understanding of protein structure and function?**

In recent years, the study of intrinsically disordered proteins (IDPs) has garnered significant attention and has led to several groundbreaking discoveries that have revolutionized our understanding of protein structure and function. Here are some of the most significant findings and breakthroughs in this field:

**1. Existence and prevalence of intrinsic disorder:** Early on, it was believed that proteins needed a well-defined three-dimensional structure to perform their functions. However, research has shown that a substantial portion of the proteome is intrinsically disordered, lacking a stable structure. It is now recognized that intrinsic disorder is a prevalent feature of many proteins and plays crucial roles in cellular processes.

**2. Functional advantages of disorder:** The functional significance of intrinsic disorder has been a subject of intense investigation. It has become evident that disorder can confer several advantages to proteins. IDPs often exhibit high conformational flexibility, enabling them to interact with multiple binding partners, undergo conformational changes, and participate in diverse biological processes such as signaling, regulation, and molecular recognition.

**3. Molecular recognition and binding mechanisms:** The study of IDPs has revealed novel mechanisms of molecular recognition and binding. Unlike structured proteins, which typically adopt a rigid structure upon binding, IDPs often retain their flexibility even when interacting with their partners. This flexibility allows for the formation of dynamic, transient complexes, and enables IDPs to exhibit binding promiscuity and adaptability in recognizing various targets.

**4. Coupling disorder and function:** It has been discovered that disorder and function are intricately linked in many proteins. The functional repertoire of IDPs can be attributed to a phenomenon known as "coupled folding and binding." This mechanism suggests that IDPs can undergo disorder-to-order transitions upon binding to their partners, allowing them to acquire a stable structure and perform their functions.

**5. Disease implications:** The study of IDPs has shed light on their involvement in various human diseases. Many proteins associated with neurodegenerative disorders, such as Alzheimer's and Parkinson's diseases, contain regions of

intrinsic disorder. Understanding the behavior of IDPs in disease states has provided insights into the pathological mechanisms underlying these conditions and has opened new avenues for therapeutic interventions.

**6. Structural characterization techniques:** Advances in experimental techniques have greatly facilitated the structural characterization of IDPs. Methods such as nuclear magnetic resonance (NMR) spectroscopy, small-angle X-ray scattering (SAXS), cryo-electron microscopy (cryo-EM), and single-molecule spectroscopy have allowed researchers to gain detailed insights into the conformational ensembles and dynamic behavior of IDPs.

Overall, the study of intrinsically disordered proteins has revolutionized our perception of protein structure and function. It has shown that disorder is not a limitation but rather a fundamental and functional characteristic of proteins. The findings and breakthroughs in this field have expanded our understanding of the complex mechanisms underlying biological processes and have significant implications for drug discovery, design, and therapeutic interventions.

### **5. How can the study of intrinsically disordered proteins contribute to a more comprehensive understanding of protein-protein interactions and cellular signaling networks?**

The study of intrinsically disordered proteins (IDPs) has emerged as a fascinating field in molecular biology, providing valuable insights into protein-protein interactions and cellular signaling networks. Traditionally, proteins were thought to adopt a well-defined three-dimensional structure to carry out their functions. However, it is now well-established that a significant portion of the proteome consists of IDPs, which lack a stable structure and exhibit high conformational flexibility.

By investigating IDPs, researchers have discovered that these proteins play crucial roles in protein-protein interactions and cellular signaling. One of the key contributions of studying IDPs lies in their ability to engage in "fuzzy" or "dynamic" interactions. Unlike structured proteins that typically bind to their partners with high specificity and affinity, IDPs often employ a variety of interaction mechanisms, including molecular recognition through short linear motifs, induced folding upon binding, and conformational selection.

IDPs act as hubs in protein-protein interaction networks, mediating connections between multiple partners and coordinating complex cellular processes. Due to their flexible nature, IDPs can interact with a wide range of binding partners, enabling them to participate in diverse signaling pathways and regulatory networks. Furthermore, the inherent plasticity of IDPs allows them to undergo post-translational modifications, such as phosphorylation or acetylation, which further modulate their interactions and functionality.

The study of IDPs has shed light on the dynamic nature of protein-protein interactions. Traditional approaches focused on well-structured proteins often overlooked the transient and weak interactions mediated by IDPs, which play crucial roles in cellular processes like signal transduction, transcriptional regulation, and cell cycle control. By investigating IDPs, researchers can gain a more comprehensive understanding of the underlying mechanisms driving protein-protein interactions.

Moreover, the study of IDPs has paved the way for the development of novel therapeutic strategies. Many diseases, including cancer and neurodegenerative disorders, are associated with aberrant protein-protein interactions. Targeting IDPs involved in these interactions offers a unique opportunity to develop therapeutics that disrupt or modulate specific protein-protein interactions, thereby restoring normal cellular function.

In summary, studying intrinsically disordered proteins provides a more holistic view of protein-protein interactions and cellular signaling networks. By considering the flexible and dynamic nature of IDPs, researchers can uncover novel interaction mechanisms, identify key regulatory nodes, and develop innovative therapeutic approaches. The investigation of IDPs represents a paradigm shift in our understanding of protein biology and holds significant promise for advancing our knowledge of complex cellular processes.

### **6. What are the roles of intrinsically disordered proteins in liquid-liquid phase separation and biogenesis of membrane-less organelles?**

Intrinsically disordered proteins (IDPs) play crucial roles in the processes of liquid-liquid phase separation (LLPS) and the biogenesis of membrane-less organelles. These proteins lack a well-defined three-dimensional structure and possess



high conformational flexibility, allowing them to interact with numerous binding partners and adopt different conformations based on their cellular environment. This unique characteristic makes them well-suited for driving and regulating LLPS, which is a phenomenon where certain components of the cell's interior undergo phase separation, leading to the formation of distinct compartments without the involvement of membranes.

One key role of IDPs in LLPS is their ability to act as scaffold or scaffold-like molecules. IDPs can form multivalent interactions with various other proteins and biomolecules, facilitating the assembly and organization of macromolecular complexes. Through weak, transient, and multivalent interactions, IDPs can bring together other proteins and molecules, leading to the formation of liquid-like droplets or membrane-less organelles. These structures often exhibit distinct physical and chemical properties, enabling compartmentalization of cellular processes and spatial regulation of biochemical reactions.

Furthermore, IDPs can also function as "sticky" or "fuzzy" interactions, promoting LLPS by forming dynamic, weak, and reversible interactions with other proteins or nucleic acids. These interactions are highly sensitive to changes in environmental conditions, such as changes in pH, temperature, or salt concentration. By undergoing LLPS, these IDP-rich droplets can concentrate specific components within the cell, creating localized microenvironments that are favorable for specific biochemical reactions or signaling events.

IDPs also contribute to the biogenesis of membrane-less organelles by serving as nucleating factors. These proteins can undergo LLPS themselves, forming initial seed droplets that recruit and concentrate other proteins or biomolecules, leading to the growth and maturation of membrane-less organelles. The phase separation process driven by IDPs can be regulated by post-translational modifications, such as phosphorylation or methylation, which modulate the affinity and interactions of IDPs with other components involved in LLPS.

Importantly, the dynamic nature of IDPs and their ability to undergo LLPS allow for rapid and reversible assembly and disassembly of membrane-less organelles in response to cellular signals or environmental cues. This enables cells to dynamically regulate the formation, composition, and dissolution of these organelles, allowing for rapid adaptation to changing physiological conditions.

In summary, the roles of intrinsically disordered proteins in liquid-liquid phase separation and the biogenesis of membrane-less organelles are multifaceted. They act as scaffold molecules, promote phase separation through weak and reversible interactions, serve as nucleating factors, and contribute to the dynamic regulation of these membrane-less organelles. These processes are crucial for compartmentalization and spatial organization of cellular processes, as well as for cellular adaptation and response to environmental changes.

## **7. How can the development of novel experimental techniques specifically tailored to study intrinsically disordered proteins advance our understanding of their structure, function, and interactions?**

Intrinsically disordered proteins (IDPs) play crucial roles in various biological processes, but their unique characteristics pose challenges for traditional structural biology techniques. However, the development of novel experimental techniques specifically tailored to study IDPs has the potential to significantly advance our understanding of their structure, function, and interactions. Here are some key ways in which such techniques can contribute to our knowledge:

**1. Conformational ensemble characterization:** IDPs exist as dynamic ensembles with multiple conformations. Traditional methods that rely on rigid protein structures struggle to capture this inherent flexibility. Advanced techniques, such as nuclear magnetic resonance (NMR) spectroscopy, single-molecule fluorescence, and small-angle X-ray scattering (SAXS), offer insights into the conformational space sampled by IDPs. These methods provide information about the structural heterogeneity, transient secondary structure elements, and the population of different conformations within an ensemble, leading to a more comprehensive understanding of IDP behavior.

**2. Mapping disorder-to-order transitions:** IDPs often undergo disorder-to-order transitions upon interaction with other molecules, such as proteins, nucleic acids, or small molecules. Novel experimental approaches, including hydrogen-deuterium exchange coupled with mass spectrometry (HDX-MS), limited proteolysis, and surface plasmon resonance (SPR), can be employed to study these conformational changes. By characterizing the regions that become

ordered upon binding, the kinetics of binding events, and the binding strength, these techniques provide valuable insights into the mechanisms underlying IDP interactions and functional regulation.

**3. Dynamics and kinetics investigation:** Understanding the dynamic behavior of IDPs is crucial for unraveling their functional roles. Novel techniques such as single-molecule spectroscopy, fluorescence correlation spectroscopy (FCS), and time-resolved X-ray scattering enable the investigation of IDP dynamics at various timescales. By monitoring fluctuations, folding events, and conformational changes, these methods offer insights into the kinetics, energy landscapes, and underlying mechanisms governing IDP function.

**4. Computational modeling validation:** Computational techniques are widely used to study IDPs, but experimental validation is essential for accurate modeling. Novel experimental techniques provide data for refining and validating computational models, such as molecular dynamics simulations and coarse-grained modeling. This iterative process helps improve the accuracy and reliability of computational predictions regarding IDP structure, function, and interactions.

**5. Drug discovery and therapeutic targeting:** IDPs have emerged as attractive targets for drug discovery due to their involvement in various diseases. However, developing drugs that target IDPs presents unique challenges. Novel experimental techniques, such as fragment-based screening, high-throughput biophysical methods, and small-angle neutron scattering (SANS), can aid in identifying small molecules or peptides that modulate the function of IDPs. These techniques enable the screening of compound libraries and the characterization of binding modes, affinity, and allosteric regulation, facilitating the development of therapeutic interventions targeting IDPs.

In summary, the development of novel experimental techniques tailored to study IDPs offers unprecedented opportunities to advance our understanding of their structure, function, and interactions. These techniques provide insights into the conformational ensembles, disorder-to-order transitions, dynamics, and kinetics of IDPs. Furthermore, they validate computational models and support drug discovery efforts, ultimately paving the way for the development of new therapeutic strategies targeting IDPs in various diseases.

## **8. How can incorporating the study of intrinsically disordered proteins into drug discovery efforts lead to the identification of novel therapeutic targets and strategies?**

Incorporating the study of intrinsically disordered proteins (IDPs) into drug discovery efforts holds immense potential for identifying novel therapeutic targets and strategies. IDPs are a unique class of proteins that lack a well-defined three-dimensional structure, yet play crucial roles in various cellular processes. They are involved in signaling pathways, protein-protein interactions, and regulation of gene expression, making them attractive candidates for drug targeting.

Firstly, the study of IDPs provides insights into previously unexplored areas of biology. By understanding the structure-function relationships and dynamic behavior of IDPs, researchers can uncover novel mechanisms underlying disease progression. This knowledge can reveal new therapeutic targets and strategies that were previously overlooked or poorly understood. For example, certain IDPs are implicated in neurodegenerative disorders like Alzheimer's and Parkinson's diseases, and by targeting their abnormal interactions or aggregation, novel therapies can be developed.

Secondly, IDPs exhibit a high degree of flexibility and can adopt multiple conformations, making them ideal targets for modulation. Traditional drug discovery approaches often focus on targeting proteins with well-defined structures, leaving a large portion of the proteome unexplored. By shifting the attention towards IDPs, drug discovery efforts can expand the range of druggable targets and increase the likelihood of finding compounds that can selectively bind to and modulate the activity of these proteins.

Furthermore, IDPs are often involved in protein-protein interactions, which are challenging to target with small molecules due to the lack of well-defined binding pockets. However, IDPs can present "hot spots" or regions with transient structure that can be targeted with small molecules or biologics. By identifying these hot spots and developing compounds that disrupt or stabilize protein-protein interactions, new therapeutic strategies can be devised.

Incorporating the study of IDPs into drug discovery efforts can also lead to the development of innovative therapeutic modalities. For instance, peptide-based therapeutics can be designed to mimic or disrupt the interactions of IDPs, providing a targeted and precise approach to modulating their functions. Additionally, the development of small molecules that can induce or stabilize specific conformations in IDPs holds promise for therapeutic intervention.

In summary, the study of intrinsically disordered proteins in drug discovery efforts can lead to the identification of novel therapeutic targets and strategies by expanding our understanding of disease mechanisms, providing new opportunities for modulation, enabling the targeting of protein-protein interactions, and fostering the development of innovative therapeutic modalities. Incorporating IDPs into the drug discovery process can unlock new avenues for addressing previously intractable diseases and improve patient outcomes.

## **9. How can we improve the acceptance and understanding of intrinsically disordered proteins in the scientific community and promote their importance in the biological sciences?**

Intrinsically disordered proteins (IDPs) are a fascinating area of study within the biological sciences, and promoting their acceptance and understanding within the scientific community is indeed crucial. To enhance the recognition and importance of IDPs, several approaches can be taken:

- 1. Research publications:** Encouraging scientists to publish their findings related to IDPs in reputable journals is essential. This helps establish a strong foundation of knowledge and evidence that can be referenced and built upon by others in the scientific community.
- 2. Scientific conferences and symposia:** Organizing dedicated sessions or symposia within conferences focused on IDPs can provide a platform for researchers to present their work, exchange ideas, and engage in discussions. This facilitates collaboration and strengthens the scientific community's understanding of IDPs.
- 3. Education and training programs:** Incorporating IDPs into curricula at academic institutions, such as universities and research institutes, is vital. Offering specialized courses, workshops, or seminars that provide comprehensive knowledge on IDPs will help train the next generation of scientists and increase their awareness of the significance of this field.
- 4. Collaborative initiatives:** Encouraging interdisciplinary collaborations between researchers from different fields, such as biochemistry, structural biology, biophysics, and computational biology, can foster a better understanding of IDPs. Collaborations can lead to innovative approaches, improved methodologies, and a broader perspective on IDPs' biological relevance.
- 5. Funding support:** Government agencies, private foundations, and scientific organizations should provide adequate funding opportunities specifically dedicated to IDP research. This financial support will incentivize researchers to explore this field further, undertake ambitious projects, and generate impactful discoveries.
- 6. Open data sharing:** Promoting open access to data, methodologies, and software related to IDPs is crucial for accelerating research progress. This enables scientists worldwide to reproduce and build upon previous studies, fostering a collaborative and cumulative approach towards IDP research.
- 7. Awareness campaigns:** Communicating the importance and implications of IDPs to the broader scientific community and the general public is essential. Organizing public lectures, writing articles in popular science magazines, and engaging with media outlets can help create awareness and generate interest in IDP research.
- 8. Professional societies and networks:** Encouraging the establishment and growth of professional societies and networks focused on IDPs can provide a platform for researchers to connect, share knowledge, and advocate for the field's significance. These societies can organize conferences, publish journals, and support early-career scientists in their research endeavors.

By employing these strategies, we can enhance the acceptance and understanding of IDPs in the scientific community. This will lead to a broader recognition of the crucial role IDPs play in various biological processes and facilitate advancements in our understanding of these fascinating proteins.

#### **10. What are the future directions and challenges in the field of intrinsically disordered proteins research, and how can the scientific community work together to address these challenges?**

Intrinsically disordered proteins (IDPs) have garnered significant attention in recent years due to their unique structural and functional characteristics. As an expert in the field, I can outline some of the future directions and challenges in IDP research, as well as propose strategies for the scientific community to address these challenges.

**1. Characterization of IDP ensembles:** One key challenge is understanding the conformational ensembles and dynamics of IDPs. These proteins often lack a well-defined three-dimensional structure, making their characterization complex. Future research should focus on developing advanced experimental and computational techniques to accurately probe and model IDP ensembles, including high-resolution methods such as NMR spectroscopy, single-molecule techniques, and cryo-electron microscopy.

**2. Functional elucidation:** Another crucial aspect is deciphering the functional roles of IDPs and their interactions with partner molecules. IDPs are involved in numerous cellular processes, including signaling, regulation, and molecular recognition. Further investigations using techniques like proteomics, interactomics, and structural biology can shed light on the specific molecular mechanisms underlying IDP function and their interactions with other biomolecules.

**3. Disease relevance:** Understanding the links between IDPs and human diseases is an emerging area of research. Many IDPs are associated with neurodegenerative disorders, cancer, and cardiovascular diseases. Future studies should aim to uncover the molecular basis of IDP involvement in these pathological conditions, allowing the development of targeted therapeutic interventions. Collaboration between biologists, clinicians, and computational scientists is vital for unraveling the disease mechanisms and potential therapeutic strategies.

**4. Computational modeling and simulations:** Given the highly dynamic nature of IDPs, computational modeling and simulations play a crucial role in understanding their behavior. However, accurately capturing the conformational ensemble and dynamics of IDPs remains a challenge. Future efforts should focus on refining existing force fields, improving sampling techniques, and developing integrative approaches that combine experimental data with computational models. This necessitates collaboration between computational biologists, biophysicists, and experimentalists.

**5. Data sharing and standardization:** To address the challenges in IDP research, it is essential for the scientific community to promote data sharing and standardization of experimental protocols. This facilitates the accumulation of high-quality datasets and enables meta-analyses that can uncover common principles governing IDP behavior. Initiatives like the Intrinsically Disordered Proteins database (IDPDB) have already made significant strides in this direction, and further efforts should be made to encourage researchers to deposit and share their IDP-related data.

**6. Interdisciplinary collaborations:** IDP research benefits greatly from interdisciplinary collaborations, as it requires expertise from various fields, including biology, biophysics, chemistry, computational sciences, and medicine. Establishing collaborative networks and fostering cross-disciplinary interactions through conferences, workshops, and funding programs can accelerate progress in the field and lead to innovative breakthroughs.

In summary, future directions in IDP research involve characterizing IDP ensembles, elucidating their functional roles, understanding their involvement in diseases, improving computational modeling, promoting data sharing, and fostering interdisciplinary collaborations. By addressing these challenges collectively, the scientific community can advance our understanding of IDPs and their implications in biological systems, leading to novel therapeutic strategies and applications in diverse fields.

#### **USE CASES**

**11. Recommend an experimental procedure for characterizing the folding landscape and structural transitions of an intrinsically disordered protein using biophysical techniques.**

To characterize the folding landscape and structural transitions of an intrinsically disordered protein, you can employ a combination of biophysical techniques. Here's an experimental procedure that could be used:

### 1. Protein Expression and Purification:

Express and purify the intrinsically disordered protein of interest using recombinant DNA technology. Ensure that the protein is properly folded and free from contaminants that could affect the subsequent experiments.

### 2. Circular Dichroism (CD) Spectroscopy:

Begin by performing CD spectroscopy to obtain the secondary structure information of the protein. Measure the far-ultraviolet (UV) CD spectrum to assess the presence of secondary structure elements, such as  $\alpha$ -helix,  $\beta$ -sheet, or random coil. Collect CD spectra at various temperatures to probe the temperature-dependent conformational changes.

### 3. Nuclear Magnetic Resonance (NMR) Spectroscopy:

Employ solution-state NMR spectroscopy to investigate the structural ensemble and dynamics of the intrinsically disordered protein. Utilize experiments such as  $^{15}\text{N}$  relaxation measurements ( $T_1$ ,  $T_2$ , and heteronuclear NOE) and chemical shift analysis to assess conformational dynamics, local structural preferences, and long-range interactions. Conduct these experiments at different temperatures to monitor temperature-induced changes in the protein's behavior.

### 4. Small-Angle X-ray Scattering (SAXS):

Utilize SAXS to obtain low-resolution structural information and study the protein's overall shape, size, and possible conformational ensembles. Collect SAXS data at different temperatures to observe changes in protein dimensions and the degree of compaction as a function of temperature.

### 5. Fluorescence Spectroscopy:

Employ fluorescence spectroscopy techniques such as fluorescence resonance energy transfer (FRET) or fluorescence correlation spectroscopy (FCS) to investigate the conformational dynamics and changes in the hydrodynamic radius of the protein. These methods can provide information on the compactness or expansion of the intrinsically disordered protein as a function of temperature or other experimental conditions.

### 6. Thermodynamic Analysis:

Perform temperature-dependent equilibrium studies to obtain thermodynamic parameters, including melting temperature ( $T_m$ ), heat capacity change ( $\Delta C_p$ ), and enthalpy change ( $\Delta H$ ), using techniques such as differential scanning calorimetry (DSC). These measurements can provide insights into the stability and folding/unfolding behavior of the protein.

### 7. Computational Modeling and Simulations:

Employ computational modeling and molecular dynamics simulations to complement the experimental data and gain a deeper understanding of the folding landscape and structural transitions of the intrinsically disordered protein. Simulations can help explore the conformational space, identify possible folding pathways, and provide atomic-level insights into the dynamics and interactions involved.

By employing this combination of biophysical techniques, including CD spectroscopy, NMR spectroscopy, SAXS, fluorescence spectroscopy, thermodynamic analysis, and computational modeling, you can gain a comprehensive characterization of the folding landscape and structural transitions of the intrinsically disordered protein under investigation.

### 12. Propose a computational approach to simulate the conformational behavior and dynamics of intrinsically disordered proteins.

To simulate the conformational behavior and dynamics of intrinsically disordered proteins, a computational approach combining molecular dynamics (MD) simulations and enhanced sampling techniques can be employed. This approach allows us to capture the transient and flexible nature of intrinsically disordered proteins (IDPs) and explore their conformational space.



**1. System Setup:** The first step is to construct a detailed model of the IDP. This involves obtaining the primary sequence of the protein of interest and assigning appropriate force field parameters to each residue. There are various force fields available that can accurately describe the behavior of IDPs.

**2. Molecular Dynamics Simulations:** MD simulations are employed to simulate the motion and behavior of atoms over time. The equations of motion, such as Newton's equations, are numerically solved to simulate the movements of individual atoms in response to the forces acting upon them. In the case of IDPs, conventional MD simulations alone may not adequately sample the diverse conformational space due to their high flexibility.

**3. Enhanced Sampling Techniques:** To overcome the limitations of conventional MD, enhanced sampling techniques are utilized. These methods aim to accelerate the exploration of conformational space and capture rare events that would otherwise be computationally prohibitive. Some popular techniques for studying IDPs include:

**a. Replica Exchange Molecular Dynamics (REMD):** REMD involves running multiple replicas of the system at different temperatures. Periodically, exchanges between replicas are attempted, allowing the system to explore a wider range of conformational states.

**b. Metadynamics:** Metadynamics employs the addition of a history-dependent potential that biases the simulation towards regions of the conformational space that have not yet been explored. This technique helps overcome energy barriers and allows for efficient sampling of the IDP's conformational landscape.

**c. Markov State Models (MSMs):** MSMs are statistical models that capture the long-timescale dynamics of IDPs. By dividing the conformational space into discrete states, MSMs can provide insights into the kinetics and thermodynamics of IDP folding and binding.

**4. Analysis and Validation:** Once the simulations are complete, various analysis techniques can be used to analyze the results and validate the simulated conformational ensembles. This may include calculating structural properties, assessing the stability of secondary structure elements, identifying transient interactions, and comparing the simulated data with experimental data when available.

It is important to note that while computational approaches offer valuable insights into the conformational behavior of IDPs, they have limitations. The accuracy of force fields, the timescale accessible to simulations, and the challenge of capturing long-range interactions accurately are factors that should be considered. Additionally, experimental data should be used to validate and refine the simulation results.

### **13. Design an experimental protocol to demonstrate the involvement of intrinsically disordered proteins in liquid-liquid phase separation.**

**Title:** Investigating the Role of Intrinsically Disordered Proteins in Liquid-Liquid Phase Separation

#### **Objective:**

The objective of this experimental protocol is to demonstrate the involvement of intrinsically disordered proteins (IDPs) in the phenomenon of liquid-liquid phase separation (LLPS). By understanding the behavior of IDPs in LLPS, we can gain insights into their functional roles and potential implications in cellular processes.

#### **Experimental Design:**

##### **1. Selection of Intrinsically Disordered Proteins:**

- Identify a set of representative IDPs that are known to be involved in LLPS based on existing literature. This selection should include IDPs with diverse properties, such as size, charge, and amino acid composition.

##### **2. Protein Expression and Purification:**

- Express the selected IDPs recombinantly in a suitable expression system, such as *E. coli* or yeast.
- Purify the IDPs using standard protein purification techniques, such as chromatography, to obtain highly pure and concentrated samples.

##### **3. Characterization of Intrinsically Disordered Proteins:**

- Perform biophysical characterization of the purified IDPs to confirm their intrinsically disordered nature. This can include techniques like circular dichroism (CD), nuclear magnetic resonance (NMR), or small-angle X-ray scattering (SAXS).
- Assess the biophysical properties of the IDPs, such as secondary structure content, flexibility, and interaction propensity.

#### **4. Preparation of Phase-Separating Systems:**

- Design phase-separating systems by selecting appropriate buffer conditions, including temperature, pH, and salt concentration, based on previous studies.
- Prepare control systems without the addition of IDPs to assess the effect of IDPs on phase separation.

#### **5. Observation and Analysis of Phase Separation:**

- Mix the phase-separating components, including IDPs and other necessary components, in a suitable experimental setup.
- Monitor the process of phase separation using imaging techniques, such as fluorescence microscopy or confocal microscopy, to visualize the formation of liquid droplets or compartments.
- Quantify the extent and kinetics of phase separation using image analysis software.

#### **6. Perturbation Studies:**

- Perform perturbation experiments to investigate the role of IDPs in phase separation. This can include the addition of specific peptides or small molecules that interact with the IDPs and modulate their behavior.
- Monitor the effect of perturbations on phase separation dynamics and droplet properties.

#### **7. Data Analysis:**

- Analyze the obtained data to quantify the impact of IDPs on phase separation, including droplet size, number, and persistence.
- Perform statistical analyses to assess the significance of the observed differences between control and experimental conditions.

#### **8. Interpretation and Conclusion:**

- Interpret the results in the context of the involvement of IDPs in LLPS, considering the biophysical properties of the IDPs and their impact on phase separation dynamics.
- Draw conclusions regarding the role of IDPs in LLPS and their potential functional relevance.

#### **9. Validation and Reproducibility:**

- Perform additional experiments to validate the findings and ensure the reproducibility of the observed results.
- Conduct further experiments, if required, to address any potential limitations or unanswered questions from the initial experiments.

#### **10. Publication and Communication:**

- Prepare a comprehensive scientific report detailing the experimental protocol, results, and conclusions.
- Disseminate the findings through peer-reviewed publications and presentations at scientific conferences to contribute to the existing knowledge in the field of intrinsically disordered proteins and liquid-liquid phase separation.

Note: This experimental protocol serves as a general guideline and may require customization based on the specific IDPs and phase-separating systems under investigation.

#### **14. Develop a pipeline for integrating multiple experimental and bioinformatics datasets to identify novel intrinsically disordered protein candidates and prioritize their functional characterization.**

To integrate multiple experimental and bioinformatics datasets to identify novel intrinsically disordered protein (IDP) candidates and prioritize their functional characterization, a multi-step pipeline can be developed. Here is a suggested approach:

**Step 1: Data Collection and Preprocessing**

- Gather relevant experimental datasets, such as proteomics, transcriptomics, and high-throughput screening data, from public repositories or collaborations.
- Collect bioinformatics datasets, including protein sequence databases, structural annotations, and functional annotations.
- Preprocess the data by removing noise, normalizing, and standardizing the datasets for compatibility.

**Step 2: IDP Prediction**

- Utilize computational tools specifically designed for IDP prediction, such as DisEMBL, IUPred, and PONDR, to assess protein disorder tendencies.
- Apply these tools to the protein sequences from the collected datasets to predict the intrinsic disorder propensity of candidate proteins.

**Step 3: Integration of Experimental and Bioinformatics Data**

- Combine the experimental datasets with the predicted IDP scores using appropriate statistical methods or machine learning algorithms.
- Correlate the experimental features with the IDP predictions to identify potential relationships.
- Integrate bioinformatics data, such as functional annotations and protein-protein interaction networks, to identify relevant biological contexts associated with the predicted IDPs.

**Step 4: Prioritization of Functional Characterization**

- Develop a scoring system or ranking algorithm to prioritize the potential functional importance of the predicted IDPs.
- Consider various criteria, such as the strength of experimental evidence, conservation across species, presence in disease-related pathways, and enrichment in specific cellular compartments.
- Assign higher priority to candidates with multiple lines of evidence supporting their functional relevance.

**Step 5: Experimental Validation**

- Select the top-ranked IDP candidates for experimental validation.
- Perform biochemical assays, such as circular dichroism spectroscopy or nuclear magnetic resonance, to validate the intrinsic disorder of the selected candidates.
- Employ functional assays, such as protein-protein interaction studies, phosphorylation assays, or cellular localization experiments, to validate the functional roles of the IDPs.

**Step 6: Functional Characterization and Interpretation**

- Analyze the experimental results to elucidate the functional implications of the validated IDPs.
- Compare the characteristics of the validated IDPs with known IDPs and other proteins to infer their potential roles in cellular processes.
- Utilize additional bioinformatics tools, such as Gene Ontology analysis or pathway enrichment analysis, to gain further insights into the functional roles and pathways associated with the validated IDPs.

It's important to note that the specific tools and methods used in each step of the pipeline may vary depending on the available data and research context. Additionally, experimental validation may require access to specialized facilities and techniques.

## **15. Outline a research plan to elucidate the molecular mechanisms underlying the aggregation and pathological behavior of disease-associated intrinsically disordered proteins, considering both in vitro and cellular models.**

Research Plan: Elucidating the Molecular Mechanisms of Disease-Associated Intrinsically Disordered Proteins

**I. Introduction**

A. Briefly explain the significance of intrinsically disordered proteins (IDPs) in disease pathology

- B. Highlight the need to elucidate the molecular mechanisms underlying IDP aggregation and pathological behavior

## II. Objective

- A. Clearly state the research objective: To unravel the molecular mechanisms involved in the aggregation and pathological behavior of disease-associated IDPs
- B. Emphasize the importance of integrating in vitro and cellular models for a comprehensive understanding

## III. Experimental Design

### A. Identification of Disease-Associated IDPs

- 1. Conduct an extensive literature review to identify well-studied disease-associated IDPs
- 2. Compile a comprehensive list of IDPs implicated in various diseases

### B. In Vitro Studies

- 1. Protein Expression and Purification
  - a. Clone and express the disease-associated IDPs using appropriate expression systems
  - b. Optimize purification protocols to obtain highly pure and monodisperse IDPs
- 2. Biophysical Characterization of IDPs
  - a. Employ various spectroscopic techniques (e.g., circular dichroism, nuclear magnetic resonance) to analyze IDP structure and conformational dynamics
  - b. Utilize fluorescence-based assays (e.g., Thioflavin T, Congo Red) to monitor IDP aggregation kinetics and assess the effect of environmental factors (pH, temperature, etc.)
- 3. Probing the Molecular Interactions
  - a. Employ techniques such as surface plasmon resonance (SPR) and isothermal titration calorimetry (ITC) to investigate interactions between IDPs and potential binding partners (e.g., proteins, nucleic acids)
  - b. Utilize pull-down assays and co-immunoprecipitation to identify and validate IDP-protein interactions
- 4. Structural Determination
  - a. Utilize cryo-electron microscopy (cryo-EM) or X-ray crystallography to determine high-resolution structures of disease-associated IDPs
  - b. Employ computational methods (e.g., molecular dynamics simulations) to gain insights into the conformational ensembles and structural dynamics of IDPs

### C. Cellular Models

- 1. Cell Culture
  - a. Choose appropriate cell lines relevant to the disease under investigation
  - b. Establish stable cell lines expressing disease-associated IDPs
- 2. Cellular Localization and Aggregation Analysis
  - a. Employ immunofluorescence staining and confocal microscopy to examine the subcellular localization of disease-associated IDPs
  - b. Employ proximity ligation assays (PLA) or fluorescence resonance energy transfer (FRET) to assess IDP aggregation in live cells
- 3. Cellular Pathological Consequences
  - a. Measure cellular viability and cytotoxicity using assays such as MTT, LDH release, or flow cytometry
  - b. Assess the effect of IDP expression on cellular processes such as apoptosis, autophagy, or proteasomal degradation
- 4. Modulating IDP Behavior
  - a. Employ pharmacological agents or genetic manipulation (e.g., RNA interference) to modulate the expression or activity of potential regulators of IDP aggregation and pathology
  - b. Evaluate the impact of these interventions on IDP aggregation and cellular pathology

**IV. Data Analysis and Interpretation**

- A. Analyze biophysical and cellular data using appropriate statistical methods
- B. Integrate in vitro and cellular findings to uncover molecular mechanisms underlying IDP aggregation and pathological behavior
- C. Develop working models and hypotheses based on the experimental results

**V. Future Directions and Implications**

- A. Discuss potential therapeutic targets and strategies for mitigating IDP-associated diseases based on the elucidated molecular mechanisms
- B. Identify unresolved questions and propose future research directions for a more comprehensive understanding of IDP biology and pathology

**VI. Conclusion**

- A. Summarize the research plan and its potential impact on understanding the molecular mechanisms of disease-associated IDPs
- B. Highlight the significance of integrating in vitro and cellular models for a comprehensive investigation



**Prompt:**

Using internet: "QUESTION HERE"

*Please assume the role of an expert and answer this question to the best of your ability. The reader should not be able to know how the answer was generated. Do not mention any limitations on your ability to access data.*

### **1. How has the traditional "one structure, one function" paradigm limited our understanding of protein functionality and roles of proteins in biological systems?**

The traditional "one structure, one function" paradigm for proteins has been foundational in our understanding of protein function. It asserts that a protein's three-dimensional structure largely determines its function, and changes in that structure can affect the protein's functionality. This is undoubtedly true in many cases, and this perspective has been instrumental in fields such as drug design, where understanding the structure of a protein target is crucial.

However, this paradigm has also limited our understanding of protein functionality and the roles proteins play in biological systems in several ways. Firstly, it can oversimplify the complexity of proteins, which often exhibit multiple functions and can exist in multiple conformational states. Recent advances in protein structure determination, for instance, have increased the proportion of novel protein folds deposited in databases, but these structures often lack functional annotations with experimental confirmation. Additionally, the complexity of the structure-function paradigm has been underscored by the discovery of "moonlighting" proteins that can perform more than one function, thereby challenging the traditional view of one structure corresponding to one function.

Secondly, the "one structure, one function" model does not fully capture the dynamic nature of proteins. Proteins are not static entities but rather can change their shape or conformation in response to various factors, allowing them to perform different functions. For example, a protein's function may vary depending on its location within a cell, the presence of other molecules, or environmental conditions such as pH or temperature.

Thirdly, the traditional paradigm may limit our understanding of genetic diseases and bacterial resistance to antibiotics. For example, inappropriate moonlighting, where proteins perform unwanted functions, has been identified as a contributing factor in some genetic diseases. Moonlighting proteins also provide a possible mechanism by which bacteria may become resistant to antibiotics.

In recent years, new techniques have been developed to study these more complex aspects of protein function. For example, the use of fluorescent nanoantennas can provide insights into protein conformational changes in real time, which in turn can reveal more about protein function.

In summary, while the "one structure, one function" paradigm has been invaluable in our understanding of protein function, it does not capture the full complexity of protein function. Proteins can perform multiple roles and can change their structure, and this dynamic nature makes them key players in biological systems. Advances in techniques to study proteins are allowing us to better understand this complexity and may open up new avenues for drug design and disease treatment.

### **2. How do intrinsically disordered proteins challenge the structure-function paradigm, and what evidence supports their importance in cellular processes?**

Intrinsically disordered proteins (IDPs) and intrinsically disordered regions (IDRs) of proteins challenge the traditional structure-function paradigm in biology, which primarily applies to enzymes, transmembrane proteins, and signaling domains. This paradigm posits that a protein's function is determined by its three-dimensional structure, which in turn is determined by its amino acid sequence. However, IDPs and IDRs do not adhere to this model. Instead of having a fixed structure, they exist in a dynamic state of conformational flexibility, forming an ensemble of structures that can interact in various ways to perform different functions. This sequence → IDP/IDR ensemble → function paradigm primarily applies to signaling and regulatory proteins and regions. In order to carry out their functions, IDPs or IDRs often cooperatively interact, either intra- or inter-molecularly, with structured proteins or other IDPs or intermolecularly with

nucleic acids. This versatility allows them to respond to a wide range of signals and orchestrate an array of organismal processes across a broad spectrum of species, ranging from micro-organisms to plants and animals.

There is growing evidence supporting the importance of IDPs in cellular processes. For example, IDPs and IDRs mediate crucial signaling processes in eukaryotic cells. The disordered nature of these proteins provides several advantages. Firstly, disordered sequences have the potential to bind to multiple partners, often using different structures. This allows IDPs to participate in a variety of cellular interactions. Secondly, disordered regions are relatively accessible and often contain multiple binding motifs, making them frequent sites for post-translational modification, which is an important mediator of the control of signaling pathways. Finally, disordered proteins play central roles in the formation of higher-order signaling assemblies and in the operation of circadian clocks. These roles underscore the vital role that IDPs play in the organization and regulation of cellular processes.

### **3. What are some misconceptions about intrinsically disordered proteins that persist in the scientific community, and how can they be addressed?**

Intrinsically disordered proteins (IDPs) are a class of proteins that lack a fixed or ordered 3D structure under physiological conditions. These proteins are highly flexible, making them functionally important for various processes in the cell, such as allosteric regulation, enzyme catalysis, cell signaling, transcription, and chromatin remodeling. However, the understanding of IDPs in the scientific community is not without misconceptions. Below are a few common misconceptions and ways they can be addressed:

#### **1. Misconception: IDPs are non-functional or less functional due to their lack of structure.**

Reality: IDPs are involved in several vital biological processes. For instance, disordered regions of these proteins often act as flexible linkers or loops, enabling conformational changes and facilitating protein interactions. Additionally, linear motifs in IDPs mediate functional interactions with other proteins and biomolecules, playing a crucial role in cell regulation and other processes.

#### **2. Misconception: IDPs don't have specific binding sites.**

Reality: Many IDPs undergo transitions to more ordered states upon binding to their targets, effectively creating specific recognition sites. These regions are termed Molecular Recognition Features (MoRFs) and can act as "molecular switches," regulating biological functions. Furthermore, IDPs can retain their conformational freedom even when bound to other proteins, potentially leading to a range of interaction dynamics and affinities.

#### **3. Misconception: IDPs have a single, defined structure in vivo.**

Reality: IDPs can adopt many different structures in vivo according to the cell's conditions, creating a structural or conformational ensemble. This structural adaptability is strongly function-related, and the existence and type of protein disorder are encoded in the protein's amino acid sequence. IDPs are typically characterized by a low content of bulky hydrophobic amino acids and a high proportion of polar and charged amino acids, which contributes to their disordered nature.

#### **4. Misconception: Traditional methods for studying protein structure are sufficient for IDPs.**

Reality: Due to the dynamic nature of IDPs, traditional methods like X-ray crystallography or cryo-electron microscopy may not fully capture their conformational diversity. Newer techniques, such as circuit topology, have been developed to track the dynamics of disordered protein domains and can provide more insight into their function and behavior.

Addressing these misconceptions is critical to advance our understanding of IDPs and their roles in cellular processes. Continued research, education, and the development of novel techniques for studying these proteins will help dispel these misconceptions and improve our understanding of their functionality and importance.

However, the topic of current misconceptions in the scientific community about IDPs is a rapidly evolving field of research. While I provided information based on the current knowledge and understanding, up-to-date information may be found in the latest research publications or reviews in the field.

#### **4. What are the most significant findings or breakthroughs in the study of intrinsically disordered proteins that have changed our understanding of protein structure and function?**

Intrinsically disordered proteins (IDPs) and protein regions (IDRs) have been subjects of increasing scientific interest over the past few decades. These proteins, unlike their structured counterparts, do not possess a fixed three-dimensional shape. Instead, they can adopt multiple conformations in response to their local environment, and this flexibility allows them to participate in a wide array of biological functions such as cellular signaling, infections, illnesses, tissue repair, and drug delivery.

A groundbreaking revelation in the field of IDPs is the discovery of their role in proteinaceous membrane-less organelles (PMLOs) biogenesis. The concept of protein intrinsic disorder and PMLOs has undergone a merger, providing a new framework for understanding the molecular mechanisms of PMLOs formation. This represents a significant paradigm shift as it offers a new perspective on how cellular structures can form without relying on defined protein structures.

Another significant breakthrough in the understanding of IDPs comes from a study on the protein Rec1-resilin, an IDP with unique characteristics. This protein, which is notably elastic and used in the development of various materials for biomedical applications, demonstrates a rapid and remarkable responsiveness to changes in its environment, such as shifts in temperature, pH, and the presence of ions and other substances. These findings highlight the potential of IDPs as tunable elements for specific tasks, such as tissue repair or therapeutic delivery, where the protein may operate under different chemical conditions.

The same study employed novel experimental and theoretical techniques to elucidate the behavior of IDPs in crowded environments, a common condition in cellular systems. This included the use of contrast-matching experiments on deuterium-labeled proteins, which revealed how crowding impacts the shape, size, stability, and structure of IDPs. This groundbreaking work has provided new insights into how IDPs function at a fundamental level in complex, crowded environments, such as those found in living cells.

Collectively, these advancements underscore the versatility and adaptability of IDPs, presenting a more nuanced view of proteins beyond the classical structure-function paradigm. They open new avenues for the development of responsive biomaterials and therapeutic strategies, and they also reshape our understanding of cellular organization and dynamics. As research in this field continues to evolve, it is likely that we will gain even more profound insights into the world of intrinsically disordered proteins.

#### **5. How can the study of intrinsically disordered proteins contribute to a more comprehensive understanding of protein-protein interactions and cellular signaling networks?**

The study of intrinsically disordered proteins (IDPs) provides crucial insights into the complexity of protein-protein interactions and cellular signaling networks due to their unique properties and diverse roles in biological systems. Unlike other proteins with well-defined tertiary structures, IDPs lack a fixed structure and instead exhibit significant conformational plasticity. This allows them to adapt to structurally different protein partners, making them vital for the regulation of key biological processes such as transcription, translation, and cell cycle regulation. Moreover, IDPs are associated with several other biological functions, including molecular recognition, binding of small molecules, and chromatin organization.

The flexible structure of IDPs enables them to bind to multiple different partners, exhibiting what is known as binding promiscuity. This property, coupled with their ability to form low-affinity complexes, makes IDPs act as hubs in interaction networks, playing a central role in the regulation of signaling pathways. This means that mapping the interactome of IDPs could significantly enhance our understanding of these pathways and their roles in various diseases, particularly noncommunicable ones where IDPs are predominantly involved.

However, the very characteristics that make IDPs so interesting and valuable - their flexibility and lack of fixed structure - also make them challenging to study using traditional methods. For instance, precise computational methods

for modelling interactions based on docking are less applicable to IDPs because these methods typically require candidates with stable, well-defined, globular three-dimensional structures.

Nevertheless, there have been advancements in methods to predict protein-protein interactions (PPIs) involving IDPs. Computational approaches have been developed that utilize machine learning to classify and predict IDP PPIs based on sequence characteristics. These in silico prediction methods can complement and expedite low-throughput experimental studies which can be expensive, labor-intensive, and biased towards well-studied proteins. Furthermore, these prediction methods can help prioritize candidates for rigorous experimental testing or eliminate those less likely to interact, thereby increasing the efficiency of discovering new interactions and functions of IDPs.

In conclusion, the study of IDPs contributes significantly to a more comprehensive understanding of protein-protein interactions and cellular signaling networks. It not only reveals the versatile roles of IDPs in various biological processes but also provides the platform for developing novel therapeutic approaches by improving our understanding of disease mechanisms. Furthermore, the development and application of computational methods for predicting IDP interactions offer promising avenues for exploring the yet uncharted areas of the human interactome.

## **6. What are the roles of intrinsically disordered proteins in liquid-liquid phase separation and biogenesis of membrane-less organelles?**

Intrinsically Disordered Proteins (IDPs) play a critical role in liquid-liquid phase separation (LLPS) and the biogenesis of membrane-less organelles (MLOs). LLPS is a process in which a homogeneous solution separates into two distinct liquid phases with different concentrations of solutes, forming macromolecular assemblies, including MLOs. The proteins found in these phase-separated condensates may play diverse roles in maintaining their integrity, composition, and biochemical properties. The roles can include acting as scaffolds, co-scaffolds, clients, and regulators. Scaffolds, which can self-associate and drive LLPS, are primarily responsible for condensate formation. Clients are low-valency molecules that are recruited to the condensate through their interactions with scaffold biomolecules.

While LLPS has been known for some time in polymer science, it has been re-discovered in eukaryotic cells and plays a vital role in the interior organization of eukaryotic cells, the formation of MLOs in prokaryotes, and during viral life cycles. Some extracellular protein interactions also facilitate LLPS.

Moreover, IDPs are an abundant organic component of hard tissues and are believed to play a significant role in the process of biomineralization. Biomineralization is the process by which organisms produce minerals under biological control, and a common inorganic component of biominerals is calcium carbonate. The role of IDPs in the formation of liquid precursors of biominerals is still being studied. Research on the interactions between proteins and divalent cations, which are essential for understanding the resulting liquid precursors, is ongoing.

In summary, IDPs play a critical role in LLPS and the biogenesis of MLOs, and they may also be significantly involved in biomineralization processes, although more research is needed in this area to fully understand their role.

## **7. How can the development of novel experimental techniques specifically tailored to study intrinsically disordered proteins advance our understanding of their structure, function, and interactions?**

The development of novel experimental techniques specifically tailored to study intrinsically disordered proteins (IDPs) can advance our understanding of their structure, function, and interactions in several ways.

Firstly, understanding the complexity of IDPs requires a shift from the traditional protein study methods that focus on a single, defined structure. IDPs, unlike traditional proteins, do not adopt a definitive structure but rather exist as an ensemble of conformations, which enable them to signal through multiple pathways and serve as scaffolds for multi-protein complexes. The challenge in studying IDPs stems from their disordered nature, which demands the development of novel techniques that can capture this inherent flexibility.

A prime example of such a novel technique is the use of Brownian dynamics simulations, facilitated by software like BrownDye 2.0. This software allows each protein molecule to be modeled as a collection of large rigid cores with

flexible connectors and loops. This approach is particularly suited for IDPs, which do not have a stable, folded structure but rather take on various conformations depending on their role in biological processes. Using Brownian dynamics simulations, scientists can measure important properties such as the hydrodynamic radius and the entanglement index, a property related to molecular association, of IDPs. This provides valuable insights into the structural properties and potential interactions of these proteins.

Despite these advances, it's important to note that these novel techniques are still in their early stages of development and face certain limitations. For example, the limitations of Browndye 2.0 arise mainly from the structural rigidity approximations and the nature of the force computations between the molecules.

As such, the development of novel experimental techniques for studying IDPs represents a significant step forward in our ability to understand these proteins. By further refining these methods and developing additional techniques, we can enhance our understanding of the structure, function, and interactions of IDPs, potentially leading to important therapeutic implications given the role of IDPs in various diseases.

#### **8. How can incorporating the study of intrinsically disordered proteins into drug discovery efforts lead to the identification of novel therapeutic targets and strategies?**

Incorporating the study of intrinsically disordered proteins (IDPs) into drug discovery efforts can indeed open up novel therapeutic targets and strategies. Unlike traditional proteins with a fixed structure, IDPs and intrinsically disordered protein regions (IDPRs) are highly dynamic and versatile, playing key roles in various aspects of cell physiology and pathology. Their unique characteristics have been associated with numerous diseases, making them attractive targets for therapeutic intervention.

Advances in experimental methods and computational approaches have facilitated the detection and characterization of these proteins at the atomic level, contributing significantly to disorder/dynamic-based drug discovery. These developments have given rise to an approach known as disorder-based drug targeting, which relies on a thorough understanding of the molecular features of IDPs and IDPRs.

To illustrate, one study successfully identified a drug that targets an intrinsically disordered protein, NUPR1, which is implicated in pancreatic ductal adenocarcinoma (PDAC). The researchers used a combination of biophysical, computational, and biological methods to screen a large number of FDA-approved compounds and ultimately identified one that effectively arrested PDAC development in mice.

However, incorporating the study of IDPs into drug discovery is not without challenges. Due to their high conformational flexibility, IDPs pose significant difficulties for biophysical studies. To overcome these challenges, researchers utilize a range of experimental and computational methods and employ integrative strategies that provide insights into the sequence-structure-function relationship of disordered proteins. Recently, there has been progress in the development of small molecule inhibitors targeting the disordered domains of vital transcription factors, highlighting the potential of IDPs as drug targets.

In summary, the study of IDPs can lead to the identification of novel therapeutic targets and strategies by enabling a deeper understanding of the dynamic nature of these proteins and their roles in disease pathology. While the challenges posed by the intrinsic disorder of these proteins require innovative approaches for their characterization and targeting, the potential benefits in terms of novel drug discovery avenues make this a promising area of research.

#### **9. How can we improve the acceptance and understanding of intrinsically disordered proteins in the scientific community and promote their importance in the biological sciences?**

Promoting acceptance and understanding of intrinsically disordered proteins (IDPs) within the scientific community involves addressing a few key areas.

Firstly, it's essential to communicate the functional importance of IDPs. Traditionally, the structure-function paradigm, where a unique 3D structure of a protein determines its unique biological function, has dominated scientific thought.

However, many protein functions do not require a unique structure. IDPs, which lack fixed, three-dimensional folds under physiological conditions, perform unique biological activities that ordered proteins may not be capable of, due to their high conformational flexibility and structural plasticity. In essence, IDPs represent complex systems that operate at the edge of chaos and are tunable by various means.

Secondly, it's important to bridge the knowledge gap between traditional protein science and the characteristics of IDPs. The transition from the classic structure-function paradigm to the structure-function continuum concept is challenging for many researchers. In this continuum concept, a single gene can produce multiple proteins with varying functions, a phenomenon that seems to defy the traditional "lock-and-key" model of protein function. In essence, understanding IDPs requires a paradigm shift in protein science, which can be facilitated by clear, effective communication and education.

Thirdly, the recognition of the natural abundance of IDPs across all living organisms and viruses can help emphasize their importance. The discovery of the wide penetrance of IDPs into all proteomes came as a surprise to many structural biologists. However, it became clear that IDPs, far from being rare exceptions, are highly prevalent in nature, thereby defining the "prevalence of exclusivity/exceptionality" or the "exceptional abundance of exceptions" concept. This understanding can help in promoting the importance of IDPs in the biological sciences.

Fourthly, improving the accuracy and reliability of computational predictions is crucial. Intrinsically disordered proteins are challenging to study experimentally, and much of our knowledge rests on computational predictions. Initiatives such as the Critical Assessment of protein Intrinsic Disorder prediction (CAID) experiment, established as a community-based blind test, can set new quality standards in the field, thereby enhancing the acceptance and understanding of IDPs.

Finally, the scientific community must continually address the difficulties in direct measurement of the dynamic behavior of IDPs, as they tend to be disordered only under specific conditions, such as pH, presence of post-translational modifications, and localization and binding. Each technique provides a unique point of view on the phenomenon of intrinsic disorder, and different types of experimental evidence give researchers insights into the functional mechanisms of IDPs. Continuing to improve these experimental methods will certainly enhance the understanding and acceptance of IDPs within the scientific community.

Overall, by addressing these points and investing in research and education, the scientific community can better appreciate the vital role of IDPs in biology and medicine.

#### **10. What are the future directions and challenges in the field of intrinsically disordered proteins research, and how can the scientific community work together to address these challenges?**

In the field of intrinsically disordered proteins (IDPs) research, some of the key future directions include understanding the formation and function of proteinaceous membrane-less organelles (PMLOs), as well as exploring the phenomena of liquid-liquid and liquid-gel phase transitions.

PMLOs are fascinating structures formed via intracellular liquid-liquid demixing phase separations and are characterized by a liquid-like behavior. The dimensions of PMLOs are cell size-dependent, and they contain proteins and RNA (and/or DNA). Importantly, the formation of PMLOs may be initiated by a number of factors, including changes in the concentrations of specific small molecules or salts, changes in the concentration of proteins undergoing phase separation, changes in the pH and/or temperature of the solution, and changes in other environmental conditions that affect the protein-protein or protein-nucleic acid interactions.

Another key aspect of future research is the study of phase transitions. In addition to liquid-liquid phase transitions, some proteins can undergo liquid-gel phase separation, leading to the formation of hydrogels. The dynamic liquid-gel phase separation depends on multivalent interactions between proteins with low complexity (LC) domains, many of which are known to be intrinsically disordered.

Furthermore, phase separation can also occur in two-dimensional systems, which can trigger the formation of large protein clusters on the membrane surface. This opens up a new avenue of research into the regulation and control of some signaling pathways via the generation of spatially organized micron-scale protein clusters.

As for the challenges, one of the main hurdles is understanding the biological functions of PMLOs. Despite their ubiquity, the functional roles of these structures remain largely unknown, yet they may serve as functional compartments within the nucleoplasm/cytoplasm.

The scientific community can address these challenges and work towards these future directions through collaborative research efforts. This may involve sharing of data and resources, conducting interdisciplinary research, and leveraging new technologies and methodologies. Furthermore, advancements in computational approaches could help decipher the complex behaviors of IDPs and PMLOs. It's also critical to invest in education and training to build a robust workforce capable of pushing the boundaries of our understanding in this field.

## USE CASES

### 11. Recommend an experimental procedure for characterizing the folding landscape and structural transitions of an intrinsically disordered protein using biophysical techniques.

There are several biophysical techniques that can be used to characterize the folding landscape and structural transitions of intrinsically disordered proteins (IDPs). Here, I will discuss a few of these techniques, which include nuclear magnetic resonance (NMR) spectroscopy and circular dichroism (CD) spectroscopy.

**1. Nuclear Magnetic Resonance (NMR) Spectroscopy:** NMR is a well-suited technique for studying IDPs, as it can provide high-resolution structural information on disordered protein states in solution. NMR can be conducted under physiological conditions and provides information about the residual structure, protein function, and protein dynamics. In particular,  $^1\text{H}$ -NMR spectra of IDPs have characteristic features. The polypeptide chains of IDPs rapidly convert between multiple conformations, resulting in poor dispersion in  $^1\text{H}$ -NMR spectra, with signals clustered around the 8.0-8.5 ppm region. In contrast,  $^1\text{H}$  spectra of structured proteins show much more dispersion, with chemical shifts ranging from 6.50-10.0 ppm. Comparing the dispersion of chemical shifts in  $^1\text{H}$  spectra provides an easy way to confirm that a protein is disordered. Assigning resonances requires multidimensional NMR, with researchers typically obtaining 2D heteronuclear single quantum coherence (HSQC) spectra when investigating IDPs.

**2. Circular Dichroism (CD) Spectroscopy:** CD spectroscopy is another technique that can be used for the assessment of the conformational properties of a protein or protein domain. This method allows for the evaluation of the dynamic secondary structure content of IDPs, which can be stabilized or perturbed by different chemical (solvent, ionic strength, pH) or physical (temperature) agents, by posttranslational modifications, and by ligands. As IDPs present dynamic conformations, CD measurements should be carried out not as single spectra performed in unique conditions, but instead changing the chemical conditions and observing the behavior, as part of the determination of the ID nature. Techniques for the analysis of residual secondary structure present in the protein under study can be used, and these techniques are straightforward to perform; they require minimal training and can be preliminary to more complex methodologies such as NMR.

Remember that IDPs are complex and can adopt a range of conformations. Therefore, a combination of methods may be required to fully characterize their behavior. Computational studies have also begun to assume an increasingly important role in interpreting and extending the impact of experimental data obtained for such systems. It is also important to note that the specific experimental protocol would need to be tailored based on the specific protein and its known or hypothesized properties.

### 12. Propose a computational approach to simulate the conformational behavior and dynamics of intrinsically disordered proteins.

To simulate the conformational behavior and dynamics of intrinsically disordered proteins (IDPs), we can employ a combination of advanced computational techniques that make use of molecular dynamics simulations. These



simulations are recognized as a powerful tool for gaining insights into the structural and dynamical features of biomolecular systems, including IDPs.

A particularly effective approach involves using enhanced sampling methods to accelerate the characterization of rare events within a timeframe consistent with conventional computational resources. One such method is Parallel Tempering Metadynamics in the Well-Tempered Ensemble (PTMetaD-WTE). This method tackles the challenge of quickly and accurately exploring large regions of phase space (i.e., conformational sampling), especially for large systems. It introduces a bias potential to speed up sampling and reconstruct the free-energy profile along a set of collective variables (CVs). The method also addresses a common problem in metadynamics: hidden degrees of freedom not accurately described by the chosen CVs can limit the extent of convergence and accuracy of results. PTMetaD-WTE overcomes this problem by coupling metadynamics with parallel tempering, although this can limit the accessible system size due to scaling challenges. Nonetheless, the efficiency of PTMetaD-WTE is improved by using the well-tempered ensemble (WTE) algorithm, which helps maintain amplified potential energy fluctuations while actively biasing additional CVs.

Another useful approach is Bias-Exchange Metadynamics (BE-MetaD). This is a metadynamics-based method that involves running several replicas of molecular dynamics simulations, each biased with metadynamics along a different CV. This approach is particularly effective for sampling rare events in complex processes where many CVs are relevant. In BE-MetaD, these replicas are periodically allowed to exchange their configurations, allowing the biasing of an unlimited number of CVs simultaneously. The low-dimensional bias acting on each replica helps the system overcome free energy barriers, and the periodic exchange between different replicas makes it possible to explore a complex multidimensional free energy landscape with high efficiency.

In summary, a combination of PTMetaD-WTE and BE-MetaD can offer a robust computational approach for simulating the conformational behavior and dynamics of IDPs, effectively exploring large conformational spaces and overcoming free energy barriers. The choice of method may depend on the specific properties of the protein being studied, the computational resources available, and the specific research question.

### 13. Design an experimental protocol to demonstrate the involvement of intrinsically disordered proteins in liquid-liquid phase separation.

Based on the information obtained, an experimental protocol to demonstrate the involvement of intrinsically disordered proteins (IDPs) in liquid-liquid phase separation (LLPS) can be designed as follows:

**1. Identification of Candidate IDPs:** Choose a set of proteins that are already known to undergo LLPS and have intrinsically disordered regions (IDRs). Use sequence analysis to identify proteins that are likely to undergo LLPS.

**2. In Vitro LLPS Assay:** Set up an in vitro system with purified IDPs under physiologically relevant conditions. Monitor the formation of LLPS droplets using live cell optical morphology imaging and fluorescence recovery after photobleaching (FRAP) or fluorescence correlation spectroscopy (FCS) to calculate the material exchange between LLPS condensates and their surroundings.

**3. Variable Conditions:** Test the influence of various environmental factors such as salt concentration, temperature, CO<sub>2</sub>/O<sub>2</sub> levels, light exposure, crowding agents, pH, and ATP on LLPS of the IDPs. Note that these factors are known to influence the transition between a monodisperse state and a droplet state in proteins involved in LLPS.

**4. High-Speed Atomic Force Microscopy (HS-AFM):** Utilize HS-AFM to directly visualize single biomolecules at 2-3 nm lateral and ~0.1 nm vertical spatial resolution, and at sub-100 ms temporal resolution under near physiological conditions. This technique can be used to characterize the shape and motion of IDP molecules and visualize their function-related dynamics.

**5. Inhibition of LLPS:** Use an agent like 1,6-hexanediol to inhibit the formation of LLPS condensates both in vitro and within cells by disrupting the hydrophobic interactions among proteins. Monitor the effect of this inhibition on the proteins' behaviors.

**6. Validation:** Validate the role of the IDRs in LLPS by comparing the in vitro experimental results under the same physiological conditions with theoretical predictions based on a model system accounting for sequence-dependent electrostatic interactions and variable salt concentrations.

The experimental protocol outlined above aims to establish the involvement of IDPs in LLPS by both direct observation and theoretical validation. It should provide a comprehensive understanding of the role of IDPs in LLPS under a variety of conditions.

#### **14. Develop a pipeline for integrating multiple experimental and bioinformatics datasets to identify novel intrinsically disordered protein candidates and prioritize their functional characterization.**

Creating a pipeline to identify and prioritize the functional characterization of intrinsically disordered proteins (IDPs) involves a complex integration of various experimental and bioinformatics datasets. Here is a suggested pipeline based on the latest literature:

**1. Sequence Analysis:** The propensity of a protein to remain unfolded is encrypted in its amino acid sequence. The sequence composition determines whether a protein would be an ordered protein with a stable folded 3-D structure or an unfolded IDP. Certain residues such as Ala, Arg, Gly, Gln, Glu, Lys, Pro, and Ser occur more frequently in IDPs, while others like Asn, Cys, Ile, Leu, Phe, Val, Trp, and Tyr are more common in ordered proteins. Use computational tools to analyze protein sequences for these disorder-promoting residues to predict potential IDPs.

**2. Experimental Data Integration:** Integrating multiple experimental data types is crucial to accurately describe IDP conformational ensembles, which link their sequences and functions. Techniques such as Nuclear Magnetic Resonance (NMR) spectroscopy, Small-angle X-ray Scattering (SAXS), and single-molecule Förster Resonance Energy Transfer (smFRET) are commonly used to understand IDPs. By using integrative modelling to implement the conformational restraints imposed by these techniques, a diverse set of experimental data can provide a high degree of confidence in the conformational ensembles generated for IDPs.

**3. Functional Characterization:** IDPs are involved in various effector functions, thus analyzing the functional roles of these proteins is essential. This involves exploring protein interactions, cellular localization, expression levels, post-translational modifications, etc. Databases that contain such functional information, such as UniProt or STRING, can be a good resource for this purpose.

**4. Disease Association:** Since many IDPs have been implicated in diseases, understanding these associations can help prioritize IDPs for further study. This can involve investigating genetic variation data, literature mining, or leveraging databases that link proteins to diseases, such as DisGeNET or ClinVar.

This pipeline provides a starting point for identifying and prioritizing IDPs for functional characterization. Each step should be carefully validated, and the results should be interpreted in the context of the limitations and assumptions inherent in each method. Further experimental validation and studies will be necessary to confirm the identity and function of potential IDP candidates.

#### **15. Outline a research plan to elucidate the molecular mechanisms underlying the aggregation and pathological behavior of disease-associated intrinsically disordered proteins, considering both in vitro and cellular models.**

The research plan for elucidating the molecular mechanisms underlying the aggregation and pathological behavior of disease-associated intrinsically disordered proteins (IDPs) will consider both in vitro and cellular models. This is a complex field with multiple avenues of investigation, and the plan will involve several steps.

**1. Literature Review:** A thorough review of existing literature will help identify gaps in current knowledge and indicate promising areas for future research. From the latest studies, it appears that hydrophobic interactions and the behavior of these proteins at different interfaces play a critical role in the transition of IDPs from a liquid-like state to a

solid-like aggregate state. These aggregates are often associated with neurodegenerative diseases like Parkinson's, Alzheimer's, Huntington's disease, and amyotrophic lateral sclerosis and frontotemporal dementia.

**2. In vitro Experiments:** These studies would involve the use of recombinant IDPs and relevant model systems such as lipid bilayers or other proteins that IDPs interact with. Advanced biophysical techniques such as surface-specific microscopic and spectroscopic techniques can be used to study the behavior of these proteins at different interfaces. The study by Maltseva et al. provides an example of this kind of research, in which they studied the low-complexity domain of the disordered 'fused in sarcoma' (FUS) protein at the air/water interface and found that a hydrophobic interface drives fibril formation and molecular ordering of FUS.

**3. Cellular Models:** Complementary to in vitro experiments, cellular models allow for the investigation of the behavior of IDPs in a more biologically relevant context. For example, fluorescently-tagged IDPs can be expressed in cells, and their behavior observed using live-cell imaging techniques. These studies can provide insights into how IDPs aggregate in the context of a cell and how these aggregates might interfere with normal cellular functions.

**4. Investigating Disease Models:** To understand the pathological behavior of these proteins, it would be valuable to study disease models. For instance, animal models genetically modified to express disease-associated IDPs could be used to study the formation of aggregates and the resulting cellular or systemic effects. This could provide insights into the molecular mechanisms underlying the pathological aggregation of these proteins.

**5. Data Analysis and Hypothesis Testing:** The data obtained from these experiments will be carefully analyzed to understand the molecular mechanisms of IDP aggregation and its pathological consequences. This will involve statistical analysis, hypothesis testing, and potentially the development of computational models to predict the behavior of these proteins.

**6. Collaborations and Interdisciplinary Approaches:** Given the complexity of this research area, collaborations with experts in various fields such as biochemistry, molecular biology, cell biology, neurobiology, and biophysics will be beneficial. Using interdisciplinary approaches can provide a more comprehensive understanding of the issue.

**7. Publication and Dissemination of Findings:** It's essential to publish and disseminate the findings of this research in peer-reviewed journals and at scientific conferences. This not only contributes to the scientific community's understanding of IDP aggregation but also allows for the refinement and improvement of the research based on the feedback received from other experts in the field.

Remember, the study of IDPs is a rapidly developing field, and this research plan should be flexible enough to accommodate new techniques, models, or areas of focus as they emerge.

**Prompt:**

*"QUESTION HERE"*

*Please assume the role of an expert and answer this question to the best of your ability. The reader should not be able to know how the answer was generated. Do not mention any limitations on your ability to access data.*

### **1. How has the traditional "one structure, one function" paradigm limited our understanding of protein functionality and roles of proteins in biological systems?**

The traditional "one structure, one function" paradigm has limited our understanding of protein functionality and roles of proteins in biological systems in a number of ways.

First, it has led to the assumption that proteins with similar structures must have similar functions. This is not always the case, as there are many examples of proteins with similar structures that have different functions. For example, the protein kinases are a family of enzymes that share a common structure, but they phosphorylate different substrates and have different biological functions.

Second, the "one structure, one function" paradigm has led to the neglect of proteins that do not have a known structure. This is because the function of a protein is often inferred from its structure, so proteins without a known structure are often assumed to have no function. However, there are many proteins that do not have a known structure, but that are still essential for life. For example, the vast majority of proteins in the human genome do not have a known structure.

Third, the "one structure, one function" paradigm has led to the assumption that proteins have a single, fixed function. This is also not always the case, as proteins can often have multiple functions. For example, the protein p53 is a transcription factor that can regulate the expression of genes involved in cell growth, cell death, and DNA repair. However, p53 can also act as a tumor suppressor, which means that it can prevent cells from becoming cancerous.

The "one structure, one function" paradigm is a useful starting point for understanding protein functionality, but it is important to remember that it is not always accurate. As we learn more about proteins, we are beginning to realize that the relationship between protein structure and function is more complex than we once thought.

In addition to the limitations mentioned above, the "one structure, one function" paradigm also has a number of other drawbacks. For example, it can make it difficult to identify new drug targets, as it assumes that all proteins with a similar structure will have the same function. This can lead to the development of drugs that are ineffective or even harmful.

Overall, the "one structure, one function" paradigm is a useful tool for understanding protein functionality, but it is important to remember that it is not always accurate. As we learn more about proteins, we are beginning to realize that the relationship between protein structure and function is more complex than we once thought.

### **2. How do intrinsically disordered proteins challenge the structure-function paradigm, and what evidence supports their importance in cellular processes?**

Intrinsically disordered proteins (IDPs) are a class of proteins that lack a fixed or ordered three-dimensional structure. This challenges the traditional structure-function paradigm, which states that the structure of a protein determines its function. IDPs are thought to function through a variety of mechanisms, including:

- **Binding to other proteins or RNA.** IDPs can bind to other proteins or RNA through a variety of interactions, including electrostatic interactions, hydrogen bonds, and hydrophobic interactions. This allows IDPs to regulate the activity of other proteins, as well as to form complexes that carry out specific functions.
- **Acting as molecular chaperones.** IDPs can act as molecular chaperones, helping to fold other proteins into their correct three-dimensional structures. This is important for the proper function of many proteins.

- **Mediating protein-protein interactions.** IDPs can mediate protein-protein interactions by binding to both proteins and forming a bridge between them. This allows IDPs to control the assembly of protein complexes.
- **Regulating gene expression.** IDPs can regulate gene expression by binding to DNA or RNA and influencing the transcription or translation of genes. This allows IDPs to control the production of proteins and other molecules.

IDPs are found in all living organisms, and they play a wide variety of roles in cellular processes. The importance of IDPs is becoming increasingly recognized, and they are a rapidly growing area of research.

Here are some specific examples of the importance of IDPs in cellular processes:

- **Transcription factors.** Many transcription factors are IDPs. Transcription factors are proteins that bind to DNA and regulate the transcription of genes.
- **Signal transduction.** Many proteins involved in signal transduction are IDPs. Signal transduction is the process by which cells respond to external stimuli.
- **Cellular adhesion.** Many proteins involved in cell-cell adhesion are IDPs. Cell-cell adhesion is essential for the formation of tissues and organs.
- **Metabolism.** Many proteins involved in metabolism are IDPs. Metabolism is the process by which cells produce energy and use nutrients.

The research on IDPs is still in its early stages, but it is clear that these proteins play a vital role in many cellular processes. As our understanding of IDPs grows, it is likely that we will discover even more about their importance in biology.

### 3. What are some misconceptions about intrinsically disordered proteins that persist in the scientific community, and how can they be addressed?

Sure. Here are some misconceptions about intrinsically disordered proteins (IDPs) that persist in the scientific community, and how they can be addressed:

- **Misconception:** IDPs are unstructured and therefore have no function.
- **Fact:** IDPs are not completely unstructured. They have regions of order, but these regions are often short and disordered regions make up the majority of the protein. IDPs can still have important functions, such as binding to other proteins, regulating gene expression, and controlling cellular processes.
- **How to address:** One way to address this misconception is to study the structure and function of IDPs in more detail. This can be done using a variety of techniques, such as NMR spectroscopy, X-ray crystallography, and computational modeling.
- **Misconception:** IDPs are rare.
- **Fact:** IDPs are actually quite common. They make up about 30% of all human proteins.
- **How to address:** One way to address this misconception is to conduct more surveys of protein structure. This will help to identify more IDPs and provide a better understanding of their prevalence in nature.
- **Misconception:** IDPs are difficult to study.
- **Fact:** IDPs can be challenging to study, but there are a number of tools and techniques that can be used to do so. These tools and techniques are becoming increasingly sophisticated, making it easier to study IDPs and understand their structure and function.
- **How to address:** One way to address this misconception is to provide more training and resources for scientists who want to study IDPs. This will help to make IDP research more accessible and encourage more scientists to pursue this field.

### 4. What are the most significant findings or breakthroughs in the study of intrinsically disordered proteins that have changed our understanding of protein structure and function?

Sure, here are some of the most significant findings or breakthroughs in the study of intrinsically disordered proteins (IDPs) that have changed our understanding of protein structure and function:

- **The discovery that IDPs are common and widespread.** Early studies of protein structure suggested that most proteins had a well-defined three-dimensional structure. However, in the early 2000s, it was discovered that a significant fraction of proteins are intrinsically disordered. This finding has led to a major rethinking of our understanding of protein structure and function.
- **The identification of the molecular features that are associated with protein disorder.** IDPs are characterized by a low content of bulky hydrophobic amino acids and a high proportion of polar and charged amino acids. They also tend to have a high number of disordered regions, which are defined as regions that are longer than 10 amino acids and do not have any secondary structure.
- **The development of new methods for studying IDPs.** The study of IDPs has been challenging due to their lack of well-defined structure. However, in recent years, new methods have been developed for studying IDPs, including NMR spectroscopy, small-angle X-ray scattering, and computational methods. These methods have allowed researchers to gain a better understanding of the structure, function, and dynamics of IDPs.
- **The identification of the roles of IDPs in cellular processes.** IDPs play a wide variety of roles in cellular processes, including transcription, translation, protein folding, signal transduction, and cell-cell interactions. They are also involved in a number of diseases, including cancer, neurodegenerative diseases, and autoimmune disorders.

These are just a few of the most significant findings or breakthroughs in the study of IDPs. As research in this area continues, we are likely to learn even more about the structure, function, and dynamics of these fascinating proteins. Here are some additional thoughts on the implications of these findings:

- IDPs challenge our traditional view of proteins as having a fixed three-dimensional structure. Instead, IDPs are dynamic and flexible, and their structure can change depending on their environment.
- IDPs can interact with a wide variety of other proteins and molecules, which gives them a wide range of potential functions.
- IDPs are involved in a number of important cellular processes, including transcription, translation, protein folding, signal transduction, and cell-cell interactions.
- IDPs are involved in a number of diseases, including cancer, neurodegenerative diseases, and autoimmune disorders.

The study of IDPs is a rapidly growing field, and there is still much that we do not know about these fascinating proteins. However, the research that has been done so far has already shown that IDPs play a critical role in cell biology, and they are likely to be an important target for drug development in the future.

## 5. How can the study of intrinsically disordered proteins contribute to a more comprehensive understanding of protein-protein interactions and cellular signaling networks?

Intrinsically disordered proteins (IDPs) are a class of proteins that lack a well-defined three-dimensional structure. Instead, they exist as disordered chains of amino acids that can adopt a variety of conformations. IDPs are found in all organisms, and they play a wide variety of roles in cellular function.

One important role of IDPs is in protein-protein interactions. IDPs can interact with other proteins through a variety of mechanisms, including electrostatic interactions, hydrogen bonds, and hydrophobic interactions. IDPs can also act as hubs in protein interaction networks, linking together multiple proteins and mediating complex signaling pathways.

Another important role of IDPs is in cellular signaling. IDPs can act as signal transducers, relaying signals from extracellular cues to the interior of the cell. IDPs can also act as signal amplifiers, increasing the strength of a signal or spreading it to multiple cell types.

The study of IDPs is a rapidly growing field of research. Scientists are still learning about the structure, function, and regulation of IDPs. However, it is clear that IDPs play a critical role in protein-protein interactions and cellular

signaling. By studying IDPs, scientists can gain a better understanding of how these proteins function and how they contribute to cell signaling.

Here are some specific examples of how the study of IDPs has contributed to our understanding of protein-protein interactions and cellular signaling:

- IDPs have been shown to play a role in the assembly of protein complexes, such as the proteasome and the ribosome.
- IDPs have been shown to mediate interactions between proteins that are involved in signal transduction, such as G proteins and receptors.
- IDPs have been shown to regulate the activity of enzymes, such as kinases and phosphatases.
- IDPs have been shown to control the stability of DNA and RNA.

The study of IDPs is still in its early stages, but it is a promising area of research with the potential to shed light on many important biological processes.

## **6. What are the roles of intrinsically disordered proteins in liquid-liquid phase separation and biogenesis of membrane-less organelles?**

Intrinsically disordered proteins (IDPs) are a class of proteins that lack a well-defined three-dimensional structure. Instead, they exist as dynamic ensembles of conformations. IDPs are often found in membraneless organelles (MLOs), which are non-membrane-bound compartments that are thought to play important roles in cellular signaling, transcription, and translation.

IDPs can participate in LLPS, a process by which a protein solution can spontaneously separate into two phases: a liquid-like phase that is enriched in IDPs and a more dilute phase that is depleted in IDPs. LLPS is thought to be driven by a variety of factors, including the hydrophobicity of IDPs, their ability to interact with each other, and the presence of other molecules in the solution.

Once IDPs have phase separated, they can form MLOs. MLOs are thought to be held together by a variety of forces, including hydrophobic interactions, electrostatic interactions, and protein-protein interactions. MLOs can be very small, on the order of a few nanometers, or they can be much larger, on the order of micrometers.

IDPs and MLOs have been implicated in a variety of cellular processes, including:

- Transcriptional regulation: IDPs can bind to DNA and RNA, and they can regulate the expression of genes.
- Translation: IDPs can interact with ribosomes and other factors involved in translation.
- Signal transduction: IDPs can bind to signaling molecules and transmit signals throughout the cell.
- Cell motility: IDPs can interact with actin filaments and other components of the cytoskeleton, and they can regulate cell movement.

IDPs and MLOs are a new and exciting area of research, and scientists are still learning about their roles in the cell. However, it is clear that IDPs are important players in many cellular processes, and they are likely to have a significant impact on our understanding of cell biology.

Here are some additional details about the roles of IDPs in LLPS and MLO biogenesis:

- IDPs can act as nucleation factors for LLPS. This means that they can help to initiate the process of phase separation.
- IDPs can stabilize MLOs once they have formed. This is thought to be due to their ability to interact with each other and with other molecules in the MLO.
- IDPs can regulate the composition and function of MLOs. This is thought to be due to their ability to bind to other proteins and to other molecules in the MLO.



Overall, IDPs are a versatile class of proteins that play important roles in LLPS and MLO biogenesis. They are likely to have a significant impact on our understanding of cell biology and on the development of new therapies for diseases.

### **7. How can the development of novel experimental techniques specifically tailored to study intrinsically disordered proteins advance our understanding of their structure, function, and interactions?**

Intrinsically disordered proteins (IDPs) are a class of proteins that do not have a well-defined three-dimensional structure. This makes them difficult to study using traditional experimental techniques, such as X-ray crystallography and nuclear magnetic resonance (NMR). However, the development of novel experimental techniques specifically tailored to study IDPs has advanced our understanding of their structure, function, and interactions.

One such technique is small-angle X-ray scattering (SAXS). SAXS can be used to probe the overall size and shape of IDPs, as well as the distribution of their amino acids. This information can be used to infer the structure of IDPs, even though they do not have a well-defined three-dimensional fold.

Another technique that is useful for studying IDPs is NMR spectroscopy. NMR can be used to determine the structure of IDPs by measuring the chemical shifts of their amino acids. However, NMR is not as effective for studying IDPs as it is for studying folded proteins. This is because the disordered nature of IDPs makes it difficult to obtain clear NMR signals.

Despite these limitations, NMR can still be used to study IDPs. By combining NMR data with data from other techniques, such as SAXS, it is possible to obtain a more complete picture of the structure and function of IDPs.

In addition to SAXS and NMR, there are a number of other experimental techniques that can be used to study IDPs. These include fluorescence spectroscopy, circular dichroism spectroscopy, and mass spectrometry. By combining data from these different techniques, it is possible to gain a more comprehensive understanding of the structure, function, and interactions of IDPs.

The development of novel experimental techniques has made it possible to study IDPs in a way that was not possible before. This has led to a greater understanding of the role that IDPs play in biology. IDPs are involved in a wide range of cellular processes, including transcription, translation, and protein folding. They are also involved in a number of diseases, such as Alzheimer's disease, Parkinson's disease, and cancer.

The continued development of novel experimental techniques will undoubtedly lead to even greater insights into the structure, function, and interactions of IDPs. This knowledge will be essential for developing new treatments for diseases that are associated with IDPs.

### **8. How can incorporating the study of intrinsically disordered proteins into drug discovery efforts lead to the identification of novel therapeutic targets and strategies?**

Intrinsically disordered proteins (IDPs) are a class of proteins that lack a fixed three-dimensional structure. They exist as ensembles of rapidly fluctuating structures and many undergo coupled folding and binding reactions. IDPs are prevalent in eukaryotes, making up about 30-40% of all proteins. They are involved in a wide range of biological processes, including cell signaling, transcription, and translation.

IDPs are attractive targets for drug discovery because they are often involved in disease pathways. For example, IDPs have been implicated in cancer, neurodegenerative diseases, and cardiovascular disease. However, IDPs are challenging targets for traditional drug discovery approaches, which rely on the knowledge of a protein's three-dimensional structure.

In recent years, there has been a growing interest in developing new drug discovery approaches that can target IDPs. Several promising approaches have been developed, including:

- **Peptide-based inhibitors:** Peptides can be designed to bind to IDPs with high specificity and affinity.

- **Small molecule inhibitors:** Small molecules can be designed to disrupt the interactions between IDPs and their binding partners.
- **RNA-based therapies:** RNA-based therapies, such as siRNAs and antisense oligonucleotides, can be used to silence the expression of IDPs.

The incorporation of the study of IDPs into drug discovery efforts has led to the identification of several novel therapeutic targets and strategies. For example, small molecule inhibitors of the IDP c-Myc have been shown to be effective in treating cancer. Peptide-based inhibitors of the IDP tau have been shown to be effective in slowing the progression of Alzheimer's disease. And RNA-based therapies targeting the IDP Bcl-2 have been shown to be effective in treating cancer.

The study of IDPs is a rapidly growing field with the potential to revolutionize drug discovery. By understanding how IDPs function and interact with other proteins, we can develop new and more effective treatments for a wide range of diseases.

Here are some additional thoughts on how the study of IDPs can be incorporated into drug discovery efforts:

- **IDPs can be used as biomarkers:** IDPs can be used to identify patients who are at risk for developing a disease or who are not responding to treatment. This information can be used to make more informed decisions about patient care.
- **IDPs can be used to develop new diagnostic tools:** IDPs can be used to develop new diagnostic tools that can be used to identify and monitor disease progression. This information can be used to improve patient outcomes.
- **IDPs can be used to develop new therapeutic agents:** IDPs can be targeted by small molecules, peptides, and RNA-based therapies. This approach has the potential to develop new and more effective treatments for a wide range of diseases.

The study of IDPs is a promising area of research with the potential to revolutionize drug discovery. By understanding how IDPs function and interact with other proteins, we can develop new and more effective treatments for a wide range of diseases.

## 9. How can we improve the acceptance and understanding of intrinsically disordered proteins in the scientific community and promote their importance in the biological sciences?

Intrinsically disordered proteins (IDPs) are a class of proteins that lack a fixed or ordered three-dimensional structure. They are often found in key cellular processes, such as signaling, transcription, and translation. However, IDPs have historically been overlooked by the scientific community, due in part to the challenges of studying their structure and function.

There are a number of ways to improve the acceptance and understanding of IDPs in the scientific community. One important step is to increase the awareness of IDPs among researchers. This can be done by publishing more research on IDPs in high-impact journals, and by providing more opportunities for training and education on IDPs.

Another important step is to develop better tools for studying IDPs. This includes developing new methods for determining the structure of IDPs, and for measuring their interactions with other proteins and molecules. Improved tools will allow researchers to better understand the structure and function of IDPs, and to develop new therapeutic strategies for targeting IDP-related diseases.

Finally, it is important to promote the importance of IDPs in the biological sciences. This can be done by highlighting the key roles that IDPs play in cellular processes, and by demonstrating the potential of IDPs as drug targets. By taking these steps, we can improve the acceptance and understanding of IDPs in the scientific community, and help to advance our understanding of biology and medicine.

Here are some specific examples of how we can improve the acceptance and understanding of IDPs:

- **Increase funding for research on IDPs.** This will help to attract more researchers to the field and to accelerate the pace of discovery.
- **Create a dedicated journal for IDP research.** This would provide a forum for researchers to publish their work and to share their findings with the broader scientific community.
- **Develop educational resources on IDPs.** This could include textbooks, online courses, and workshops.
- **Organize conferences and workshops on IDPs.** This would provide opportunities for researchers to meet and collaborate, and to learn about the latest advances in the field.

By taking these steps, we can help to ensure that IDPs receive the attention and recognition that they deserve.

#### 10. What are the future directions and challenges in the field of intrinsically disordered proteins research, and how can the scientific community work together to address these challenges?

Intrinsically disordered proteins (IDPs) are a class of proteins that lack a well-defined structure. They are often found in complex biological processes, such as protein folding, signal transduction, and cell-cell interactions. However, our understanding of IDPs is still in its early stages, and there are many challenges that need to be addressed in order to fully understand their role in biology.

One of the main challenges in IDP research is the difficulty of studying them experimentally. IDPs are often difficult to purify and characterize, and they can be difficult to study using traditional methods, such as X-ray crystallography and nuclear magnetic resonance spectroscopy. As a result, much of what we know about IDPs comes from theoretical studies and computer simulations.

Another challenge in IDP research is the lack of a unified theoretical framework for understanding how IDPs fold and function. There are many different theories about how IDPs interact with each other and with other molecules, but there is no single theory that has been universally accepted. This makes it difficult to design experiments to test specific hypotheses about IDPs.

Despite these challenges, there has been significant progress in IDP research in recent years. New methods for studying IDPs have been developed, and new theories about how IDPs fold and function have been proposed. As a result, our understanding of IDPs is rapidly growing.

In the future, IDP research is likely to focus on a number of key areas, including:

- Developing new methods for studying IDPs
- Developing a unified theoretical framework for understanding IDPs
- Identifying the roles of IDPs in biological processes
- Developing therapeutic strategies that target IDPs

The scientific community can work together to address these challenges by sharing data and resources, collaborating on research projects, and developing new technologies. By working together, we can make significant progress in understanding IDPs and their role in biology.

Here are some specific examples of how the scientific community can work together to address the challenges in IDP research:

- **Data sharing:** Researchers can share data on IDPs, such as protein sequences, structures, and biochemical properties. This will help other researchers to replicate experiments and to build on existing knowledge.
- **Resource sharing:** Researchers can share resources, such as laboratory equipment and facilities. This will help to reduce the cost of IDP research and to make it more accessible to researchers from all over the world.
- **Collaboration:** Researchers can collaborate on research projects. This will allow them to pool their expertise and resources to tackle the challenges in IDP research.
- **Technology development:** Researchers can develop new technologies to study IDPs. This will help to overcome the limitations of current methods and to gain a deeper understanding of IDPs.

By working together, the scientific community can make significant progress in understanding IDPs and their role in biology. This research has the potential to lead to new insights into diseases and to the development of new therapies.

## USE CASES

### 11. Recommend an experimental procedure for characterizing the folding landscape and structural transitions of an intrinsically disordered protein using biophysical techniques.

Sure, here is an experimental procedure for characterizing the folding landscape and structural transitions of an intrinsically disordered protein using biophysical techniques:

1. **Solubilize the protein in a buffer that is compatible with the biophysical techniques you plan to use.** The buffer should be at the appropriate pH and ionic strength, and it should contain any necessary cofactors or ligands.
2. **Measure the size and shape of the protein using size-exclusion chromatography or dynamic light scattering.** This will give you an idea of the overall size and shape of the protein, as well as any changes in size or shape that occur as the protein folds.
3. **Measure the thermodynamic properties of the protein, such as its melting temperature and heat capacity.** This will give you information about the stability of the protein's folded state, as well as the energy landscape that the protein must traverse to fold.
4. **Measure the structural dynamics of the protein using nuclear magnetic resonance spectroscopy or circular dichroism spectroscopy.** This will give you information about the timescales on which the protein folds and unfolds, as well as the structural changes that occur during folding and unfolding.
5. **Study the protein's interactions with other molecules using biophysical techniques such as isothermal titration calorimetry or surface plasmon resonance.** This will give you information about how the protein's structure and dynamics are affected by its interactions with other molecules.

By using a combination of these biophysical techniques, you can gain a comprehensive understanding of the folding landscape and structural transitions of an intrinsically disordered protein. This information can be used to design experiments to study the protein's function, as well as to develop new therapeutic strategies for diseases that are caused by intrinsically disordered proteins.

Here are some additional considerations that may be relevant to your experimental design:

- The choice of biophysical techniques will depend on the specific protein you are studying and the questions you are trying to answer. For example, NMR spectroscopy is a powerful technique for studying protein structure, but it can be difficult to use for proteins that are large or have a high degree of disorder.
- The concentration of the protein in your solution will also affect the results of your experiments. For example, if the concentration is too high, the protein may aggregate, which can make it difficult to study its folding and unfolding.
- The temperature and pH of your solution can also affect the results of your experiments. For example, the protein's folding temperature may be different at different pH values.

### 12. Propose a computational approach to simulate the conformational behavior and dynamics of intrinsically disordered proteins.

Sure, here is a computational approach to simulate the conformational behavior and dynamics of intrinsically disordered proteins (IDPs):

1. **Identify the disordered regions of the protein.** This can be done using a variety of methods, including NMR spectroscopy, circular dichroism spectroscopy, and protein structure prediction algorithms.
2. **Build a coarse-grained model of the protein.** This means representing the protein as a simplified representation that captures the essential features of its structure and dynamics. Coarse-grained models can be

built using a variety of methods, including molecular dynamics simulations, Monte Carlo simulations, and statistical mechanics.

3. **Perform molecular dynamics simulations of the protein.** This means simulating the movement of the atoms in the protein over time. Molecular dynamics simulations can be used to study the conformational behavior and dynamics of IDPs in detail.
4. **Analyze the results of the simulations.** This can be done using a variety of methods, including statistical analysis, machine learning, and visualization. By analyzing the results of the simulations, it is possible to gain insights into the conformational behavior and dynamics of IDPs.

This is just one example of a computational approach to simulating the conformational behavior and dynamics of IDPs. There are many other approaches that can be used, and the best approach for a particular protein will depend on the specific properties of the protein.

Here are some additional considerations that may be important when choosing a computational approach to simulating IDPs:

- The size of the protein. Larger proteins will require more computational resources to simulate.
- The complexity of the protein. Proteins with a lot of disordered regions or that interact with other proteins may be more difficult to simulate.
- The accuracy of the simulation. Some computational approaches are more accurate than others. The desired level of accuracy will depend on the application.

By carefully considering these factors, it is possible to choose a computational approach that is well-suited for simulating the conformational behavior and dynamics of a particular IDP.

### 13. Design an experimental protocol to demonstrate the involvement of intrinsically disordered proteins in liquid-liquid phase separation.

Sure, here is an experimental protocol to demonstrate the involvement of intrinsically disordered proteins (IDPs) in liquid-liquid phase separation (LLPS):

1. **Obtain an IDP.** There are many IDPs that have been characterized and studied, so you should be able to find one that is relevant to your research interests. You can obtain an IDP from a variety of sources, including commercial suppliers, research laboratories, or even your own cells.
2. **Prepare a solution of the IDP.** The concentration of the IDP solution will depend on the specific IDP you are using, but it is typically in the range of 1-10 mg/mL.
3. **Add a co-solvent.** A co-solvent is a solvent that can interact with the IDP and promote LLPS. Common co-solvents include urea, guanidine hydrochloride, and polyethylene glycol.
4. **Monitor the phase separation.** You can monitor the phase separation by measuring the turbidity of the solution. As the IDPs phase separate, the solution will become more turbid. You can also use other methods to monitor the phase separation, such as light scattering or NMR spectroscopy.
5. **Characterize the phase-separated droplets.** Once the phase separation has occurred, you can characterize the phase-separated droplets by measuring their size, shape, and composition. You can also use other methods to characterize the phase-separated droplets, such as fluorescence spectroscopy or electron microscopy.

This is just a general protocol, and the specific steps you need to take will depend on the specific IDP you are using. However, this protocol should give you a good starting point for demonstrating the involvement of IDPs in LLPS.

Here are some additional considerations that may be relevant to your experimental design:

- The concentration of the IDP solution is important. If the concentration is too low, there will not be enough IDPs to form a phase-separated droplet. If the concentration is too high, the IDPs may aggregate instead of forming a phase-separated droplet.

- The type of co-solvent you use can also affect the phase separation. Some co-solvents are more effective at promoting LLPS than others.
- The temperature of the solution can also affect the phase separation. LLPS is typically more pronounced at higher temperatures.
- The presence of other proteins or molecules in the solution can also affect the phase separation. These other molecules may compete with the IDPs for binding to the co-solvent or for other interactions that promote LLPS.

By carefully considering these factors, you can design an experimental protocol that is more likely to yield successful results.

#### **14. Develop a pipeline for integrating multiple experimental and bioinformatics datasets to identify novel intrinsically disordered protein candidates and prioritize their functional characterization.**

Here is a pipeline for integrating multiple experimental and bioinformatics datasets to identify novel intrinsically disordered protein candidates and prioritize their functional characterization:

1. **Collect experimental data.** This can include data from protein structure determination methods such as X-ray crystallography or NMR spectroscopy, as well as data from bioinformatics methods such as sequence analysis and protein-protein interaction networks.
2. **Preprocess the data.** This may involve cleaning the data, removing noise, and aligning the sequences.
3. **Identify potential disordered regions.** This can be done using a variety of methods, such as disorder prediction algorithms, secondary structure analysis, and solvent accessibility calculations.
4. **Cluster the potential disordered regions.** This can be done using a variety of methods, such as hierarchical clustering or k-means clustering.
5. **Identify novel intrinsically disordered protein candidates.** This can be done by looking for clusters of potential disordered regions that are associated with known functions or that are located in important regions of the protein, such as the active site or the binding site.
6. **Prioritize the functional characterization of novel intrinsically disordered protein candidates.** This can be done by considering factors such as the size and composition of the cluster, the location of the cluster in the protein, and the known functions of proteins that are similar to the novel protein.

This pipeline can be used to identify novel intrinsically disordered protein candidates and prioritize their functional characterization. It is important to note that this is just one possible pipeline, and there are many other ways that this could be done. The specific methods that are used will depend on the available data and the specific goals of the study. Here are some additional tips for identifying novel intrinsically disordered protein candidates:

- Look for proteins that are difficult to crystallize or that have no known structure.
- Look for proteins that are highly expressed in cells or tissues that are known to be involved in disease.
- Look for proteins that are involved in protein-protein interactions.
- Look for proteins that have a high degree of sequence conservation.

By following these tips, you can increase your chances of identifying novel intrinsically disordered protein candidates.

#### **15. Outline a research plan to elucidate the molecular mechanisms underlying the aggregation and pathological behavior of disease-associated intrinsically disordered proteins, considering both in vitro and cellular models.**

Here is a research plan to elucidate the molecular mechanisms underlying the aggregation and pathological behavior of disease-associated intrinsically disordered proteins, considering both in vitro and cellular models:

##### **In vitro studies**

- Characterize the structure and dynamics of disease-associated IDPs using a variety of techniques, including NMR spectroscopy, circular dichroism, and fluorescence spectroscopy.
- Investigate the effects of mutations, post-translational modifications, and environmental factors on the structure and dynamics of disease-associated IDPs.
- Study the interaction of disease-associated IDPs with other proteins and small molecules.
- Identify potential binding partners for disease-associated IDPs.
- Develop assays to measure the aggregation of disease-associated IDPs.

### **Cellular studies**

- Express disease-associated IDPs in cells and monitor their aggregation.
- Investigate the effects of disease-associated IDPs on cell morphology, function, and survival.
- Identify the cellular pathways that are affected by disease-associated IDPs.
- Develop animal models of disease-associated IDPs.

This research plan will provide a comprehensive understanding of the molecular mechanisms underlying the aggregation and pathological behavior of disease-associated IDPs. This knowledge will be essential for the development of new therapies for these diseases.

### **Additional considerations**

In addition to the studies outlined above, it is also important to consider the following factors when studying disease-associated IDPs:

- The role of IDPs in normal cellular function.
- The role of IDPs in other diseases.
- The potential for IDPs to be used as therapeutic targets.

By taking all of these factors into account, we can gain a deeper understanding of the role of IDPs in human disease and develop new strategies for preventing and treating these diseases.
